# Supplementary material for: Brawn before bite in endemic Asian eutherian mammals after the end-Cretaceous extinction
Source: eLife. 2026 Jun 30;14:RP108917. doi: 10.7554/eLife.108917 (PMC13318306; doi:10.7554/eLife.108917)
Supplement: Source data 1. [file elife-108917-data1.xlsx]

## Sheet: DataS1
Clade	Genus	Species	Locality	# specimens	Reference
Anagalida	Anaptogale	wanghoensis	Qianshan Basin, Anhui	1	21
Anagalida	Anchilestes	impolitus	Qianshan Basin, Anhui	1	22
Anagalida	Anictops	tabiepedis	Qianshan Basin, Anhui	1	23
Anagalida	Chianshania	gianghuaiensis	Qianshan Basin, Anhui	1	21
Anagalida	Diacronus	anhuiensis	Qianshan Basin, Anhui	1	21
Anagalida	Haltictops	mirabilis	Nanxiong Basin, Guangdong	2	24
Anagalida	Hsiuannania	minor	Chijiang Basin, Jiangxi	1	25
Anagalida	Hsiuannania	tabiensis	Qianshan Basin, Anhui	3	26
Anagalida	Huaiyangale	chianshanensis	Qianshan Basin, Anhui	2	26
Anagalida	Linnania	lofoensis	Shanghu Fm, Guangdong	1	27
Anagalida	Paranictops	majuscula	Qianshan Basin, Anhui	1	23
Anagalida	Stenanagale	xiangensis	Chaling Basin, Hunan	1	28
Anagalida	Wanogale	hodungensis	Qianshan Basin, Anhui	1	21
Anagalida	Yangtanglestes	rotundus	Chaling Basin, Hunan	1	28
Arctostylopida	Asiostylops	spanios	Chijiang Basin, Jiangxi	1	29
Arctostylopida	Bothriostylops	medius	Nanxiong Basin, Guangdong	3	30
Arctostylopida	Bothriostylops	notios	Chijiang Basin, Jiangxi	1	31
Arctostylopida	Bothriostylops	progressus	Qianshan Basin, Anhui	9	32
Arctostylopida	Sinostylops	promissus	Qianshan Basin, Anhui	2	32
Arctostylopida	Wanostylops	promissus	Qianshan Basin, Anhui	2	33
Arctostylopida	Wanostylops	youngi	Xuancheng Basin, Anhui	3	34
Pantodonta	Altilambda	minor	Nanxiong Basin, Guangdong	1	35
Pantodonta	Altilambda	pactus	Qianshan Basin, Anhui	2	36
Pantodonta	Altilambda	tenuis	Qianshan Basin, Anhui	2	36
Pantodonta	Archaeolambda	micron	Nanxiong Basin, Guangdong	2	37
Pantodonta	Archaeolambda	tabiensis	Qianshan Basin, Anhui	1	38
Pantodonta	Bemalambda	nanhsiungensis	Nanxiong Basin, Guangdong	3	27
Pantodonta	Guichilambda	zhaii	Qianshan Basin, Anhui	4	39
Pantodonta	Harpyodus	decorus	Chijiang Basin, Jiangxi	1	40
Pantodonta	Harpyodus	euros	Qianshan Basin, Anhui	1	22
Pantodonta	Harpyodus	progressus	Xuancheng Basin, Anhui	1	34
Pantodonta	Hypsilolambda	chalingensis	Chaling Basin, Hunan	2	28
Pantodonta	Plethorodon	chienshanensis	Qianshan Basin, Anhui	1	41
Pantodonta	Pseudanisonchus	antelios	Chijiang Basin, Jiangxi	1	42
Pantodonta	Yuodon	protoselenoides	Nanxiong Basin, Guangdong	1	27
Tillodontia	Dysnoetodon	minuta	Nanxiong Basin, Guangdong	2	43
Tillodontia	Interogale	datangensis	Nanxiong Basin, Guangdong	1	44
Data S1.
Chinese Paleocene mammal taxa included in the dataset, with locality, number of specimens used, and reference for the taxonomic classification. Related to Fig. 1.
