# Supplementary material for: Brawn before bite in endemic Asian eutherian mammals after the end-Cretaceous extinction
Source: eLife. 2026 Jun 30;14:RP108917. doi: 10.7554/eLife.108917 (PMC13318306; doi:10.7554/eLife.108917)
Supplement: Source data 2. [file elife-108917-data2.xlsx]

## Sheet: Sheet1
Specimen #	Clade	Genus	Species	Modality	Element	Mesh Model	3D printed?	Age	Locality
IVPP V12039L	Arctostylopida	Bothriostylops	progressus	CT	Dentary (L)	DONE	NOT YET	Late Paleocene
IVPP V12039R	Arctostylopida	Bothriostylops	progressus	CT	Dentary (R)	DONE	NOT YET	Late Paleocene
IVPP V12665.1	Arctostylopida	Bothriostylops	progressus	CT	Dentary (L)	DONE	NOT YET	Late Paleocene
IVPP V12665.2	Arctostylopida	Bothriostylops	progressus	CT	Dentary (L)	DONE	NOT YET	Late Paleocene
IVPP V12666	Arctostylopida	Wanostylops	promissus	CT	Palate (L)	DONE	NOT YET	Late Paleocene	Anhui
IVPP V12666.1	Arctostylopida	Wanostylops	promissus	CT	Dentary (L)	DONE	NOT YET	Late Paleocene	Anhui
IVPP V11357	Arctostylopida	Wanostylops	youngi	CT	LM1-M2	DONE	YES (TOO SMALL)	Late Paleocene	Anhui
IVPP V11357.1	Arctostylopida	Wanostylops	youngi	CT	RM3	DONE	YES (TOO SMALL)	Late Paleocene	Anhui
IVPP V11357.2	Arctostylopida	Wanostylops	youngi	CT	Ldp4	DONE	YES (TOO SMALL)	Late Paleocene	Anhui
IVPP V4264.1	Arctostylopida	Bothriostylops	progressus	CT	Dentary (R)	DONE	YES (TOO SMALL)	Late Paleocene	Qianshan (Anhui)
IVPP V4264.2	Arctostylopida	Bothriostylops	progressus	CT	Dentary (R)	DONE	YES (TOO SMALL)	Late Paleocene	Qianshan (Anhui)
IVPP V4264.3	Arctostylopida	Bothriostylops	progressus	CT	Dentary (R)	DONE	YES (TOO SMALL)	Late Paleocene	Qianshan (Anhui)
IVPP V4264.4	Arctostylopida	Bothriostylops	progressus	CT	Dentary (R)	DONE	YES (TOO SMALL)	Late Paleocene	Qianshan (Anhui)
IVPP V4264.5	Arctostylopida	Bothriostylops	progressus	CT	Dentary (R)	DONE	YES (TOO SMALL)	Late Paleocene	Qianshan (Anhui)
IVPP V13504(a)	Arctostylopida	Bothriostylops	medius	CT	Dentary	DONE	YES (TOO SMALL)	Middle Paleocene	Guangdong
IVPP V13504(b)	Arctostylopida	Bothriostylops	medius	CT	Palate 1	DONE	YES (TOO SMALL)	Middle Paleocene	Guangdong
IVPP V13504(c)	Arctostylopida	Bothriostylops	medius	CT	Palate 2	DONE	YES (TOO SMALL)	Middle Paleocene	Guangdong
IVPP V4263	Arctostylopida	Sinostylops	promissus	CT	Dentary (R)	DONE	NOT YET (TOO SMALL)	Middle Paleocene	Anhui
IVPP V7642	Arctostylopida	Bothriostylops	notios	CT	Dentary (L)	DONE	YES (TOO SMALL)	Middle Paleocene	Jiangxi
IVPP V4116	Pantodont	Bemalambda	nanhsiungensis	CT	Cranium	DONE	YES	Early Paleocene	Shanghu Fm, Guangdong
IVPP V4236	Pantodont	Yuodon	protoselenoides	CT	Dentary (R)	DONE	YES	Early Paleocene	Shanghu Fm, Guangdong
IVPP V4316	Pantodont	Harpyodus	euros	CT	Palate (L)	DONE	YES	Early Paleocene	Wanghudun-Qianshan, Anhui
IVPP V4861.1	Pantodont	Hypsilolambda	chalingensis	Surface scan	Mandible	DONE	YES	Early Paleocene	Zaoshi Fm, Chaling Basin, Hunan
IVPP V4861	Pantodont	Hypsilolambda	chalingensis	Surface scan	Cranium	DONE	YES	Early Paleocene	Zaoshi Fm, Chaling Basin, Hunan
IVPP V5230	Pantodont	Altilambda	tenuis	CT	Dentary (L)	DONE	YES	Early Paleocene	Wanghudun-Qianshan, Anhui
IVPP V5231	Pantodont	Altilambda	tenuis	CT	Dentary (L)	DONE	YES	Early Paleocene	Wanghudun-Qianshan, Anhui
IVPP V5784left	Pantodont	Archaeolambda	micron	Surface scan	Dentary	DONE	YES (low qual)	Early Paleocene	Shanghu Fm, Guangdong
IVPP V5784right	Pantodont	Archaeolambda	micron	Surface scan	Dentary	DONE	YES (low qual)	Early Paleocene	Shanghu Fm, Guangdong
IVPP V8304	Pantodont	Plethorodon	chienshanensis	Surface scan	Palate (R)	DONE	YES	Early Paleocene	Wanghudun-Qianshan, Anhui
IVPP V5228	Pantodont	Altilambda	pactus	Surface scan	Mandible	DONE	YES	Early Paleocene	Wanghudun-Qianshan, Anhui
IVPP V12037	Pantodont	Guichilambda	zhaii	Surface scan	Dentary (R)	DONE	NO (prep needed)	Late Paleocene	Shuangtasi Fm, Meigeng, Guichi (Anhui)
IVPP V12037.1	Pantodont	Guichilambda	zhaii	Surface scan	Ramus	DONE	NO (no teeth)	Late Paleocene	Shuangtasi Fm, Meigeng, Guichi (Anhui)
IVPP V12037.2	Pantodont	Guichilambda	zhaii	Surface scan	Dentary (L)	DONE	YES	Late Paleocene	Shuangtasi Fm, Meigeng, Guichi (Anhui)
IVPP V12037.3	Pantodont	Guichilambda	zhaii	Surface scan	Palate (R)	DONE	YES	Late Paleocene	Shuangtasi Fm, Meigeng, Guichi (Anhui)
IVPP V12664	Pantodont	Harpyodus	progressus	CT	Palate (L)	DONE	YES	Late Paleocene	Tujinshan-Shuangtasi (Anhui)
IVPP V5229	Pantodont	Altilambda	pactus	CT	Dentary (L)	DONE	YES	Middle Paleocene	Nongshan Fm, Guangdong
IVPP V5035.1	Pantodont	Harpyodus	decorus	CT	Cranium (no scale)	DONE	NOT YET (no scale)	Middle Paleocene	Chijiang Fm, Jiangxi
IVPP V5041	Pantodont	Pseudanisonchus	antelios	CT	M2	DONE	YES	Middle Paleocene	Chijiang Fm, Jiangxi
IVPP V5302	Pantodont	Altilambda	minor	CT	Mandible	DONE	YES	Middle Paleocene	Nongshan Fm, Guangdong
IVPP V5838	Tillodontia	Dysnoetodon	minuta	CT	M2	DONE	YES	Early Paleocene	Shanghu Fm, Guangdong
IVPP V5837	Tillodontia	Dysnoetodon	minuta	CT	Toothrows	NO	NO	Early Paleocene	Shanghu Fm, Guangdong
IVPP V4273 / UCMP124715	Anagalida	Wanogale	hodungensis	CT of cast	Rm2	DONE	NO	Early Paleocene	Wanghudun-Qianshan, Anhui
IVPP V4312/UCMP124717	Anagalida	Anaptogale	wanghoensis	CT of cast	Palate (L)	DONE	NO	Early Paleocene	Wanghudun-Qianshan, Anhui
IVPP V4272/UCMP124718	Anagalida	Chianshania	gianghuaensis	CT of cast	Palate (R)	DONE	NO	Early Paleocene	Wanghudun-Qianshan, Anhui
IVPP V4315/UCMP124726	Anagalida	Anchilestes	impolitus	CT of cast	Upper & lower dentition (Lp4-m3 ok)	DONE (lower only)	NO	Early Paleocene	Wanghudun-Qianshan, Anhui
IVPP V4269/UCMP124730	Anagalida	Huaiyangale	chianshanensis	CT of cast	Upper & lower dentition	DONE	NO	Early Paleocene	Wanghudun-Qianshan, Anhui
IVPP V4132/UCMP124804	Pantodont	Bemalambda	nanhsiungensis	CT of cast	Dentary (R)	DONE	NO	Early Paleocene	Shanghu Fm, Guangdong
IVPP V4124/UCMP124803	Pantodont	Bemalambda	nanhsiungensis	CT of cast	Maxilla (R)	DONE	NO	Early Paleocene	Shanghu Fm, Guangdong
MgM-II-54/UCMP128241	Pantodont	Archaeolambda	planicanina	CT of cast	LM1	DONE	NO	Late Paleocene	Naran Bulak Fm, Mongolia
IVPP V5481/UCMP124787	Pantodont	Pastoralodon	lacustris	CT of cast	Maxilla (R)	DONE	NO	Late Paleocene	Nomogen Fm, Innger Mongolia
IVPP V4333/UCMP124714	Pantodont	Archaeolambda	tabiensis	CT of cast (x2)	Dentary (R)	DONE	NO	Middle Paleocene	Doumu Fm, Qianshan Anhui
IVPP V1262/UCMP124748	Arctostylopida	Sinostylops	promissus	CT of cast	right i-m2			Late Paleocene	Doumu, Qianshan (Anhui)
IVPP V4314/UCMP124735	Anagalida	Hsiuannania	sp.	CT of cast	Lp1-2,dp3-4			Late Paleocene	Doumu, Qianshan (Anhui)
IVPP V4275/UCMP124734	Anagalida	Hsiuannania	tabiensis	CT of cast	Rm1-2			Late Paleocene	Doumu, Qianshan (Anhui)
IVPP V4271/UCMP124716	Anagalida	Diacronus	anhuiensis	CT of cast	RP1-M2			Late Paleocene	Wanghudun, Qianshan (Anhui)
IVPP V4267/UCMP124731	Anagalida	Huaiyangale	chianshanensis	CT of cast	Rp3-m3			Late Paleocene	Wanghudun, Qianshan (Anhui)
IVPP V4860/UCMP124792	Anagalida	Stenanagale	xiangensis	CT of cast	Lp3-m2			Early Paleocene	Zaoshi Fm, Chaling Basin, hunan
IVPP V4868/UCMP124793	Anagalida	Yangtanglestes	rotundus	CT of cast	Rp2-4			Early Paleocene	Zaoshi Fm, Chaling Basin, hunan
IVPP V6861/UCMP 218939	Tillodontia	Interogale	datangensis	CT of cast	L+Ri2-m3			Early Paleocene	Shanghu Fm, Guangdong
IVPP V4274/UCMP124733	Anagalida	Hsiuannania	tabiensis	CT of cast	RP4-M3			Late Paleocene	Doumu, Qianshan (Anhui)
IVPP V5161/UCMP124740	Anagalida	Haltictops	mirabilis	CT of cast	Rp4-m3			Middle Paleocene	Nongshan Fm, Guangdong
IVPP V5181.1/UCMP124741	Anagalida	Haltictops	mirabilis	CT of cast	Lm1-m2			Middle Paleocene	Nongshan Fm, Guangdong
IVPP V4282/UCMP124761	Anagalida	Anictops	tabienpedis	CT of cast	LC-M3			Late Paleocene	Wanghudun, Qianshan (Anhui)
IVPP V4303/UCMP124762	Anagalida	Paranictops	majuscula	CT of cast	Lp3-m3			Late Paleocene	Wanghudun, Qianshan (Anhui)
IVPP V5024/UCMP124808	Anagalida	Hsiuannania	minor	CT of cast	Rm2-m3			Middle Paleocene	Chijiang Fm, Jiangxi
IVPP V5042/UCMP124810	Arctostylopida	Asiostylops	spenios	CT of cast	RP2-M3,LM2-M3,Lc-m3			Middle Paleocene	Chijiang Fm, Jiangxi
IVPP V4234/UCMP124713	Anagalida	Linnania	lofoensis	CT of cast	RP4-M3,LP4-M2,Lm2-m3,Rdentary			Early Paleocene	Shanghu Fm, Guangdong
