# Supplementary material for: Brawn before bite in endemic Asian eutherian mammals after the end-Cretaceous extinction
Source: eLife. 2026 Jun 30;14:RP108917. doi: 10.7554/eLife.108917 (PMC13318306; doi:10.7554/eLife.108917)
Supplement: Source data 3. [file elife-108917-data3.xlsx]

## Sheet: Sheet1
FE model name	File	compress_se	shear_se	model_area	model_volume	compress_force	shear_force	FE resolution	adj_comp_se	adj_shear_se	compress % difference	shear % difference	Reference
default	V5228_Lm1.ply	7.62e-06	5.42e-06	219.863	4833.97	219.863	439.726	9999	7.62e-06	5.42e-06	-	-	-
default	V5231_Lm1.ply	3.72e-06	2.26e-06	100.178	1003.56	100.178	200.356	9998	1.11808e-05	6.79266e-06	-	-	-
default - 9k	V5228_Lm1_cast	3.57088e-06	5.44303e-06	187.286	3507.6	187.286	374.572	9437	4.46973e-06	6.81312e-06	0.413422	0.204477	from original
default - 9k	V5231_Lm1_cast	3.00571e-06	2.63912e-06	95.4812	911.666	95.4812	190.962	9114	9.66218e-06	8.48374e-06	0.135828	0.199331	from original
38k	V5228_Lm1_cast	3.3866e-06	4.8987e-06	187.286	3507.6	187.286	374.572	37748	4.23906e-06	6.13178e-06	0.0516063	0.100005	from previous resolution
151k	V5228_Lm1_cast	3.27256e-06	4.50357e-06	187.286	3507.6	187.286	374.572	150992	4.09631e-06	5.63719e-06	0.0336739	0.0806602	from previous resolution
603k	V5228_Lm1_cast	3.17254e-06	4.18007e-06	187.286	3507.6	187.286	374.572	603968	3.97112e-06	5.23226e-06	0.0305632	0.0718319	from previous resolution
36k	V5231_Lm1_cast	2.81882e-06	2.46393e-06	95.4812	911.666	95.4812	190.962	36456	9.0614e-06	7.92057e-06	0.0621783	0.066382	from previous resolution
146k	V5231_Lm1_cast	2.65567e-06	2.33056e-06	95.4812	911.666	95.4812	190.962	146824	8.53694e-06	7.49184e-06	0.0578788	0.054129	from previous resolution
583k	V5231_Lm1_cast	2.51703e-06	2.20231e-06	95.4812	911.666	95.4812	190.962	583296	8.09126e-06	7.07956e-06	0.0522053	0.0550297	from previous resolution
