# Supplementary material for: Brawn before bite in endemic Asian eutherian mammals after the end-Cretaceous extinction
Source: eLife. 2026 Jun 30;14:RP108917. doi: 10.7554/eLife.108917 (PMC13318306; doi:10.7554/eLife.108917)
Supplement: Source data 5. [file elife-108917-data5.xlsx]

## Sheet: Tooth_Area&Sqrt
Clade	Genus	Species	Age	Interval	Tooth	File	2D_Area	Sqrt_Area
Pantodonta	Bemalambda	Nanhsiungensis	Early Paleocene	A	P3_	V4116_RP3.ply	13647.8	116.824
Pantodonta	Archaeolambda	tabiensis	Middle Paleocene	B	M_2	V4333_Rm2.ply	11904.7	109.109
Pantodonta	Harpyodus	decorus	Middle Paleocene	B	M2_	V5035.1_RM2.ply	11527.3	107.365
Pantodonta	Bemalambda	Nanhsiungensis	Early Paleocene	A	P3_	V4116_LP3.ply	10473.4	102.339
Pantodonta	Archaeolambda	tabiensis	Middle Paleocene	B	M_3	V4333_Rm3.ply	9437.08	97.1447
Pantodonta	Harpyodus	decorus	Middle Paleocene	B	P4_	V5035.1_RP4.ply	6850.54	82.768
Arctostylopida	Bothriostylops	medius	Middle Paleocene	B	M2_	V13504_palate2_LM2_.ply	1856.34	43.0852
Anagalida	Chianshania	gianghuaensis	Early Paleocene	A	M1_	V4272_RM1_.ply	200.458	14.1583
Pantodonta	Altilambda	pactus	Early Paleocene	A	M_2	V5228_Rm2.ply	149.959	12.2458
Pantodonta	Yuodon	protoselenoides	Early Paleocene	A	M_1	V4236_Rm1.ply	139.505	11.8112
Pantodonta	Bemalambda	Nanhsiungensis	Early Paleocene	A	M2_	V4116_LM2.ply	135.152	11.6255
Pantodonta	Hypsilolambda	chalingensis	Early Paleocene	A	M3_	V4861_LM3.ply	131.021	11.4464
Arctostylopida	Bothriostylops	progressus	Late Paleocene	C	M_3	V12665.2_Rm3.ply	125.82	11.217
Tillodontia	Interogale	datangensis	Early Paleocene	A	P_3	UCMP218939_LP_3.ply	124.598	11.1624
Anagalida	Huaiyangale	chianshanensis	Early Paleocene	A	M3_	V4269_LM3_.ply	122.223	11.0555
Pantodonta	Archaeolambda	micron	Early Paleocene	A	M_3	V5784_Rm3.ply	121.922	11.0418
Anagalida	Anchilestes	impolitus	Early Paleocene	A	M_1	V4315_Lm1.ply	117.828	10.8549
Arctostylopida	Bothriostylops	notios	Middle Paleocene	B	M_2	V7642_Lm2.ply	111.454	10.5572
Pantodonta	Bemalambda	Nanhsiungensis	Early Paleocene	A	M2_	V4124_RM2_.ply	108.473	10.4151
Pantodonta	Bemalambda	Nanhsiungensis	Early Paleocene	A	M_1	V4132_Rm1.ply	101.995	10.0992
Tillodontia	Interogale	datangensis	Early Paleocene	A	M_3	UCMP218939_RM_3.ply	99.1626	9.95804
Pantodonta	Bemalambda	Nanhsiungensis	Early Paleocene	A	P_4	V4132_Rp4.ply	96.9046	9.84401
Anagalida	Huaiyangale	chianshanensis	Early Paleocene	A	P_4	V4269_Lp4.ply	94.5809	9.72527
Pantodonta	Plethorodon	chienshanensis	Early Paleocene	A	M2_	V8304_LM2.ply	93.7679	9.68338
Pantodonta	Yuodon	protoselenoides	Early Paleocene	A	M_2	V4236_Rm2.ply	92.2026	9.60222
Pantodonta	Plethorodon	chienshanensis	Early Paleocene	A	P4_	V8304_RP4.ply	92.1614	9.60007
Anagalida	Haltictops	mirabilis	Middle Paleocene	B	M_3	UCMP124740_RM_3.ply	90.6512	9.52109
Pantodonta	Archaeolambda	tabiensis	Middle Paleocene	B	M_1	V4333_Rm1.ply	89.5264	9.46184
Pantodonta	Yuodon	protoselenoides	Early Paleocene	A	M_3	V4236_Rm3.ply	88.843	9.42566
Pantodonta	Plethorodon	chienshanensis	Early Paleocene	A	M1_	V8304_LM1.ply	85.334	9.23764
Pantodonta	Bemalambda	Nanhsiungensis	Early Paleocene	A	M3_	V4124_RM3_.ply	72.794	8.53194
Pantodonta	Altilambda	tenuis	Early Paleocene	A	M_1	V5231_Lm1.ply	72.5729	8.51897
Anagalida	Paranictops	majuscula	Late Paleocene	C	M1_	UCMP124762_LM1_.ply	72.2329	8.49899
Pantodonta	Hypsilolambda	chalingensis	Early Paleocene	A	P3_	V4861_RP3.ply	65.2044	8.07492
Arctostylopida	Asiostylops	spenios	Middle Paleocene	B	M2_	UCMP124810_RM2_.ply	63.4549	7.96586
Arctostylopida	Bothriostylops	medius	Middle Paleocene	B	P3_	V13504_palate2_LP3_.ply	56.5835	7.5222
Pantodonta	Harpyodus	decorus	Middle Paleocene	B	P3_	V5035.1_RP3.ply	54.7784	7.40125
Arctostylopida	Sinostylops	promissus	Late Paleocene	C	M_2	UCMP124748_RM_2.ply	52.4521	7.24238
Pantodonta	Altilambda	pactus	Early Paleocene	A	M_1	V5228_Rm1.ply	47.9726	6.92622
Pantodonta	Plethorodon	chienshanensis	Early Paleocene	A	P1_	V8304_LP1.ply	43.6368	6.60582
Anagalida	Huaiyangale	chianshanensis	Early Paleocene	A	M_2	V4269_Lm2.ply	39.0275	6.2472
Anagalida	Anictops	tabienpedis	Late Paleocene	C	M1_	UCMP124761_LM1_.ply	38.582	6.21144
Anagalida	Huaiyangale	chianshanensis	Late Paleocene	C	M_3	UCMP124731_RM_3.ply	32.413	5.69325
Pantodonta	Archaeolambda	micron	Early Paleocene	A	M_2	V5784_Rm2.ply	31.4759	5.61034
Arctostylopida	Bothriostylops	progressus	Late Paleocene	C	M_3	V12665.1_Lm3.ply	31.1079	5.57744
Anagalida	Diacronus	anhuiensis	Late Paleocene	C	M1_	UCMP124716_RM1_.ply	31.0655	5.57364
Pantodonta	Bemalambda	Nanhsiungensis	Early Paleocene	A	P4_	V4116_RP4.ply	30.7367	5.54407
Arctostylopida	Wanostylops	youngi	Late Paleocene	C	M1_	V11357_LM1_.ply	30.7359	5.54399
Pantodonta	Hypsilolambda	chalingensis	Early Paleocene	A	M1_	V4861_RM1.ply	29.9686	5.47436
Anagalida	Haltictops	mirabilis	Middle Paleocene	B	M_2	UCMP124740_RM_2.ply	29.892	5.46735
Arctostylopida	Bothriostylops	progressus	Late Paleocene	C	M_2	V4264.1_Rm2.ply	28.0691	5.29803
Anagalida	Hsiuannania	tabiensis	Late Paleocene	C	M_2	UCMP124734_RM_2.ply	27.9393	5.28576
Anagalida	Huaiyangale	chianshanensis	Early Paleocene	A	M_3	V4269_Lm3.ply	26.8595	5.18261
Arctostylopida	Bothriostylops	notios	Middle Paleocene	B	M_1	V7642_Lm1.ply	24.8764	4.98762
Pantodonta	Hypsilolambda	chalingensis	Early Paleocene	A	M2_	V4861_LM2.ply	24.1456	4.91381
Tillodontia	Interogale	datangensis	Early Paleocene	A	P_4	UCMP218939_LP_4.ply	23.8637	4.88504
Pantodonta	Bemalambda	Nanhsiungensis	Early Paleocene	A	P_3	V4132_Rp3.ply	23.2261	4.81935
Anagalida	Anchilestes	impolitus	Early Paleocene	A	P_4	V4315_Lp4.ply	22.8202	4.77705
Pantodonta	Yuodon	protoselenoides	Early Paleocene	A	P_4	V4236_Rp4.ply	22.3723	4.72994
Pantodonta	Pastoralodon	lacustris	Late Paleocene	C	M2_	V5481_RM2_.ply	21.7414	4.66276
Anagalida	Anchilestes	impolitus	Early Paleocene	A	M_3	V4315_Lm3.ply	20.5193	4.52983
Pantodonta	Bemalambda	Nanhsiungensis	Early Paleocene	A	M3_	V4116_LM3.ply	20.444	4.52151
Tillodontia	Interogale	datangensis	Early Paleocene	A	M_1	UCMP218939_RM_1.ply	20.2201	4.49668
Pantodonta	Harpyodus	decorus	Middle Paleocene	B	M1_	V5035.1_RM1.ply	19.5262	4.41885
Pantodonta	Altilambda	minor	Middle Paleocene	B	M_1	V5302_Rm1.ply	18.9138	4.349
Pantodonta	Harpyodus	decorus	Middle Paleocene	B	M3_	V5035.1_LM3.ply	18.7428	4.32929
Pantodonta	Guichilambda	zhaii	Late Paleocene	C	M_2	v12037.2_Lm2.ply	18.0811	4.25219
Arctostylopida	Asiostylops	spenios	Middle Paleocene	B	M3_	UCMP124810_RM3_.ply	18.0555	4.24917
Pantodonta	Plethorodon	chienshanensis	Early Paleocene	A	P3_	V8304_LP3.ply	17.9906	4.24154
Arctostylopida	Wanostylops	promissus	Late Paleocene	C	M2_	V12666_LM2_.ply	17.8926	4.22997
Pantodonta	Bemalambda	Nanhsiungensis	Early Paleocene	A	M3_	V4116_RM3.ply	16.6949	4.08594
Tillodontia	Interogale	datangensis	Early Paleocene	A	M_3	UCMP218939_LM_3.ply	16.6832	4.08451
Pantodonta	Plethorodon	chienshanensis	Early Paleocene	A	M2_	V8304_RM2.ply	16.6522	4.08072
Anagalida	Huaiyangale	chianshanensis	Late Paleocene	C	P_3	UCMP124731_RP_3.ply	16.4089	4.05079
Pantodonta	Harpyodus	decorus	Middle Paleocene	B	P4_	V5035.1_LP4.ply	16.231	4.02877
Pantodonta	Plethorodon	chienshanensis	Early Paleocene	A	P3_	V8304_RP3.ply	16.2175	4.02709
Pantodonta	Bemalambda	Nanhsiungensis	Early Paleocene	A	M1_	V4124_RM1_.ply	16.0553	4.0069
Anagalida	Chianshania	gianghuaensis	Early Paleocene	A	M2_	V4272_RM2_.ply	15.7211	3.96499
Anagalida	Haltictops	mirabilis	Middle Paleocene	B	P_4	UCMP124740_RP_4.ply	15.6865	3.96062
Anagalida	ANAptogale	wanghoensis	Early Paleocene	A	P3_	V4312_LP3_.ply	15.679	3.95967
Pantodonta	Plethorodon	chienshanensis	Early Paleocene	A	M3_	V8304_LM3.ply	15.4285	3.92791
Pantodonta	Plethorodon	chienshanensis	Early Paleocene	A	M1_	V8304_RM1.ply	15.1273	3.88938
Pantodonta	Hypsilolambda	chalingensis	Early Paleocene	A	M3_	V4861_RM3.ply	15.0966	3.88543
Anagalida	Stenanagale	xiangensis	Early Paleocene	A	P_3	UCMP124792_LP_3.ply	14.7289	3.83782
Anagalida	Hsiuannania	tabiensis	Late Paleocene	C	M_1	UCMP124734_RM_1.ply	14.6488	3.82737
Anagalida	Anictops	tabienpedis	Late Paleocene	C	M2_	UCMP124761_LM2_.ply	14.3905	3.79348
Anagalida	Chianshania	gianghuaensis	Early Paleocene	A	P3_	V4272_RP3_.ply	14.1558	3.76242
Pantodonta	Hypsilolambda	chalingensis	Early Paleocene	A	M1_	V4861_LM1.ply	14.082	3.75259
Pantodonta	Bemalambda	Nanhsiungensis	Early Paleocene	A	M2_	V4116_RM2.ply	14.0377	3.7467
Anagalida	Stenanagale	xiangensis	Early Paleocene	A	M_2	UCMP124792_LM_2.ply	13.7303	3.70544
Pantodonta	Plethorodon	chienshanensis	Early Paleocene	A	M3_	V8304_RM3.ply	13.6894	3.69992
Pantodonta	Altilambda	tenuis	Early Paleocene	A	M1_	V5230_LM1.ply	13.6843	3.69923
Pantodonta	Bemalambda	Nanhsiungensis	Early Paleocene	A	M_2	V4132_Rm2.ply	13.4441	3.66662
Pantodonta	Archaeolambda	tabiensis	Middle Paleocene	B	P_4	V4333_Rp4.ply	13.2232	3.63637
Anagalida	Hsiuannania	sp	Late Paleocene	C	P_2	UCMP124735_LP_2.ply	13.2232	3.63637
Pantodonta	Hypsilolambda	chalingensis	Early Paleocene	A	M2_	V4861_RM2.ply	13.2002	3.63321
Pantodonta	Bemalambda	Nanhsiungensis	Early Paleocene	A	P4_	V4124_RP4_.ply	13.1559	3.62711
Anagalida	Hsiuannania	minor	Middle Paleocene	B	M_3	UCMP124808_RM_3.ply	13.1187	3.62198
Anagalida	Stenanagale	xiangensis	Early Paleocene	A	P_4	UCMP124792_LP_4.ply	12.9697	3.60135
Tillodontia	Dysnoetodon	minuta	Early Paleocene	A	M2_	V5838_LM2.ply	12.7618	3.57236
Arctostylopida	Asiostylops	spenios	Middle Paleocene	B	M_1	UCMP124810_LM_1.ply	12.3981	3.5211
Pantodonta	Bemalambda	Nanhsiungensis	Early Paleocene	A	M1_	V4116_RM1.ply	12.2565	3.50093
Pantodonta	Pseudanisonchus	antelios	Middle Paleocene	B	M2_	V5041_RM2.ply	12.1442	3.48485
Pantodonta	Yuodon	protoselenoides	Early Paleocene	A	P_3	V4236_Rp3.ply	11.9262	3.45344
Anagalida	Yangtanglestes	rotundus	Early Paleocene	A	P_4	UCMP124793_RP_4.ply	11.7675	3.43037
Pantodonta	Harpyodus	decorus	Middle Paleocene	B	M1_	V5035.1_LM1.ply	11.6487	3.41302
Tillodontia	Interogale	datangensis	Early Paleocene	A	M_2	UCMP218939_LM_2.ply	11.4942	3.39031
Pantodonta	Bemalambda	Nanhsiungensis	Early Paleocene	A	M_3	V4132_Rm3.ply	11.4942	3.3903
Tillodontia	Interogale	datangensis	Early Paleocene	A	P_2	UCMP218939_LP_2.ply	11.4096	3.37782
Arctostylopida	Bothriostylops	medius	Middle Paleocene	B	P4_	V13504_palate2_LP4_.ply	11.3093	3.36293
Anagalida	Wanogale	hodungensis	Early Paleocene	A	M_2	V4273_Rm2.ply	11.2749	3.35781
Anagalida	Haltictops	mirabilis	Middle Paleocene	B	M_1	UCMP124740_RM_1.ply	11.0781	3.32838
Anagalida	Huaiyangale	chianshanensis	Early Paleocene	A	P_3	V4269_Lp3.ply	10.7325	3.27605
Arctostylopida	Sinostylops	promissus	Late Paleocene	C	M_3	UCMP124748_RM_3.ply	10.703	3.27155
Pantodonta	Archaeolambda	tabiensis	Middle Paleocene	B	P_3	V4333_Rp3.ply	10.5789	3.25252
Pantodonta	Archaeolambda	micron	Early Paleocene	A	M_3	V5784_Lm3.ply	10.4663	3.23517
Pantodonta	Guichilambda	zhaii	Late Paleocene	C	P3_	v12037.3_RP3_.ply	10.3844	3.22249
Anagalida	Huaiyangale	chianshanensis	Late Paleocene	C	M_1	UCMP124731_RM_1.ply	10.1518	3.18618
Arctostylopida	Wanostylops	promissus	Late Paleocene	C	P4_	V12666_LP4_.ply	9.50558	3.08311
Arctostylopida	Sinostylops	promissus	Late Paleocene	C	M_1	UCMP124748_RM_1.ply	9.36405	3.06007
Pantodonta	Plethorodon	chienshanensis	Early Paleocene	A	P1_	V8304_RP1.ply	9.24003	3.03974
Anagalida	Chianshania	gianghuaensis	Early Paleocene	A	P4_	V4272_RP4_.ply	9.20001	3.03315
Pantodonta	Harpyodus	decorus	Middle Paleocene	B	P2_	V5035.1_RP2.ply	8.69803	2.94924
Anagalida	Hsiuannania	tabiensis	Late Paleocene	C	M2_	UCMP124733_RM2_.ply	8.08112	2.84273
Pantodonta	Pastoralodon	lacustris	Late Paleocene	C	M3_	V5481_RM3_.ply	7.95267	2.82005
Anagalida	Hsiuannania	sp	Late Paleocene	C	P_1	UCMP124735_LP_1.ply	7.806	2.79392
Arctostylopida	Bothriostylops	notios	Middle Paleocene	B	P_4	V7642_Lp4.ply	7.57129	2.7516
Anagalida	Huaiyangale	chianshanensis	Late Paleocene	C	M_2	UCMP124731_RM_2.ply	7.52552	2.74327
Pantodonta	Archaeolambda	micron	Early Paleocene	A	M_2	V5784_Lm2.ply	7.49426	2.73756
Tillodontia	Interogale	datangensis	Early Paleocene	A	M_1	UCMP218939_LM_1.ply	7.44481	2.72852
Anagalida	Huaiyangale	chianshanensis	Late Paleocene	C	P_4	UCMP124731_RP_4.ply	7.34939	2.71098
Pantodonta	Harpyodus	decorus	Middle Paleocene	B	P3_	V5035.1_LP3.ply	7.34727	2.71059
Arctostylopida	Bothriostylops	progressus	Late Paleocene	C	M_3	V4264.5_Rm3.ply	7.18258	2.68003
Pantodonta	Plethorodon	chienshanensis	Early Paleocene	A	P4_	V8304_LP4.ply	7.17273	2.67819
Arctostylopida	Asiostylops	spenios	Middle Paleocene	B	P4_	UCMP124810_RP4_.ply	7.11118	2.66668
Pantodonta	Yuodon	protoselenoides	Early Paleocene	A	P_2	V4236_Rp2.ply	7.06979	2.65891
Pantodonta	Guichilambda	zhaii	Late Paleocene	C	M1_	v12037.3_RM1_.ply	6.90257	2.62728
Arctostylopida	Sinostylops	promissus	Late Paleocene	C	P_1	UCMP124748_RP_1.ply	6.87117	2.62129
Arctostylopida	Asiostylops	spenios	Middle Paleocene	B	M3_	UCMP124810_LM3_.ply	6.65097	2.57895
Arctostylopida	Asiostylops	spenios	Middle Paleocene	B	P_4	UCMP124810_LP_4.ply	6.55886	2.56103
Arctostylopida	Asiostylops	spenios	Middle Paleocene	B	P_3	UCMP124810_LP_3.ply	6.44644	2.53898
Anagalida	Huaiyangale	chianshanensis	Early Paleocene	A	P4_	V4269_LP4_.ply	5.96823	2.443
Anagalida	Yangtanglestes	rotundus	Early Paleocene	A	P_3	UCMP124793_RP_3.ply	5.93782	2.43676
Arctostylopida	Bothriostylops	medius	Middle Paleocene	B	M1_	V13504_palate2_LM1_.ply	5.87332	2.42349
Anagalida	Hsiuannania	tabiensis	Late Paleocene	C	M3_	UCMP124733_RM3_.ply	5.76365	2.40076
Arctostylopida	Wanostylops	promissus	Late Paleocene	C	M_1	V12666.1_Lm1.ply	5.54095	2.35392
Arctostylopida	Wanostylops	promissus	Late Paleocene	C	M1_	V12666_LM1_.ply	5.41645	2.32733
Arctostylopida	Bothriostylops	progressus	Late Paleocene	C	P_3	V4264.3_Rp3.ply	5.18768	2.27765
Pantodonta	Guichilambda	zhaii	Late Paleocene	C	M_1	v12037.2_Lm1.ply	5.05153	2.24756
Anagalida	Paranictops	majuscula	Late Paleocene	C	M2_	UCMP124762_LM2_.ply	5.03943	2.24487
Arctostylopida	Sinostylops	promissus	Late Paleocene	C	P_3	UCMP124748_RP_3.ply	4.99127	2.23412
Arctostylopida	Asiostylops	spenios	Middle Paleocene	B	M_3	UCMP124810_LM_3.ply	4.70101	2.16818
Anagalida	Anictops	tabienpedis	Late Paleocene	C	P2_	UCMP124761_LP2_.ply	4.51693	2.12531
Pantodonta	Guichilambda	zhaii	Late Paleocene	C	P_4	v12037.2_Lp4.ply	4.51195	2.12413
Anagalida	Paranictops	majuscula	Late Paleocene	C	M3_	UCMP124762_LM3_.ply	4.42102	2.10262
Arctostylopida	Asiostylops	spenios	Middle Paleocene	B	M_2	UCMP124810_LM_2.ply	4.20348	2.05024
Arctostylopida	Asiostylops	spenios	Middle Paleocene	B	P3_	UCMP124810_RP3_.ply	4.17396	2.04303
Anagalida	Anictops	tabienpedis	Late Paleocene	C	M3_	UCMP124761_LM3_.ply	3.87767	1.96918
Arctostylopida	Sinostylops	promissus	Late Paleocene	C	P_2	UCMP124748_RP_2.ply	3.80245	1.94999
Anagalida	Hsiuannania	sp	Late Paleocene	C	P_4	UCMP124735_LP_4.ply	3.7626	1.93974
Pantodonta	Guichilambda	zhaii	Late Paleocene	C	M2_	v12037.3_RM2_.ply	3.65903	1.91286
Anagalida	Hsiuannania	minor	Middle Paleocene	B	M_2	UCMP124808_RM_2.ply	3.49989	1.8708
Anagalida	Anictops	tabienpedis	Late Paleocene	C	P3_	UCMP124761_LP3_.ply	3.32647	1.82386
Pantodonta	Bemalambda	Nanhsiungensis	Early Paleocene	A	P3_	V4124_RP3_.ply	3.31437	1.82054
Pantodonta	Guichilambda	zhaii	Late Paleocene	C	P_3	v12037.2_Lp3.ply	3.27062	1.80848
Anagalida	Diacronus	anhuiensis	Late Paleocene	C	M2_	UCMP124716_RM2_.ply	3.20887	1.79133
Arctostylopida	Bothriostylops	progressus	Late Paleocene	C	P_4	V4264.3_Rp4.ply	3.17394	1.78155
Arctostylopida	Wanostylops	youngi	Late Paleocene	C	M2_	V11357_LM2_.ply	3.07892	1.75469
Pantodonta	Harpyodus	decorus	Middle Paleocene	B	M3_	V5035.1_RM3.ply	2.94086	1.71489
Arctostylopida	Sinostylops	promissus	Late Paleocene	C	P_4	UCMP124748_RP_4.ply	2.75028	1.6584
Pantodonta	Guichilambda	zhaii	Late Paleocene	C	P4_	v12037.3_RP4_.ply	2.68855	1.63968
Arctostylopida	Bothriostylops	progressus	Late Paleocene	C	P_4	V12665.1_Lp4.ply	2.65236	1.62861
Pantodonta	Plethorodon	chienshanensis	Early Paleocene	A	P2_	V8304_LP2.ply	2.5502	1.59693
Arctostylopida	Bothriostylops	progressus	Late Paleocene	C	P_2	V12039L_Lp2.ply	2.5396	1.59361
Anagalida	Hsiuannania	tabiensis	Late Paleocene	C	P4_	UCMP124733_RP4_.ply	2.50514	1.58276
Anagalida	Paranictops	majuscula	Late Paleocene	C	P4_	UCMP124762_LP4_.ply	2.49162	1.57849
Anagalida	Paranictops	majuscula	Late Paleocene	C	P3_	UCMP124762_LP3_.ply	2.38776	1.54524
Anagalida	Diacronus	anhuiensis	Late Paleocene	C	P4_	UCMP124716_RP4_.ply	2.25013	1.50004
Pantodonta	Harpyodus	progressus	Late Paleocene	C	P4_	v12664_LP4_.ply	2.15532	1.4681
Arctostylopida	Asiostylops	spenios	Middle Paleocene	B	P_1	UCMP124810_LP_1.ply	2.04822	1.43116
Pantodonta	Pastoralodon	lacustris	Late Paleocene	C	M1_	V5481_RM1_.ply	1.92117	1.38606
Pantodonta	Pastoralodon	lacustris	Late Paleocene	C	P4_	V5481_RP4_.ply	1.73131	1.31579
Anagalida	Anictops	tabienpedis	Late Paleocene	C	P4_	UCMP124761_LP4_.ply	0.884524	0.940491

## Sheet: ANOVA&variancetest
Partition	Test	Statistic	E. to M. Paleocene	M. to L. Paleocene
All-Area	ANOVA	F	16.16
		p	<0.0001
All-Area	t test	p	0.92	<0.0001
All-sqrt-Area	t test	p	0.92	<0.0001
All-sqrt-Area	variance test	F	0.32271	233.71
		p	<0.0001	<0.0001
All-sqrt-Area no outliers	variance test	F	1.7959	1.5009
		p	0.05666	0.1649
All-Area	variance test	F	0.38747	23613
		p	0.0003	<0.0001
All-Area no outliers	variance test	F	2.7753	1.902
		p	0.001233	0.02813
