# Supplementary material for: Brawn before bite in endemic Asian eutherian mammals after the end-Cretaceous extinction
Source: eLife. 2026 Jun 30;14:RP108917. doi: 10.7554/eLife.108917 (PMC13318306; doi:10.7554/eLife.108917)
Supplement: Source data 6. [file elife-108917-data6.xlsx]

## Sheet: DTA&FEA_outputs_FEA_adjusted
Specimen_order	Clade	Genus	Species	Age	Interval	Tooth	File	DNE	DNE+40p	DNE-40p	Convex_DNE	Concave_DNE	Convex_Area	Concave_Area	Slope	Slope+5p	Slope-5p	OPCR	OPCR+32p	OPCR-32p	0 deg.	5.625 deg.	11.25 deg.	16.875 deg.	22.5 deg.	28.125 deg.	33.75 deg.	39.375 deg.	RFI	RFI+13p	RFI-13p	3D_Area	2D_Area	Alpha	compress_se	shear_se	model_area	model_volume	compress_force	shear_force	adj_comp_se	adj_comp_se_40plus	adj_compe_se_40minus	adj_shear_se	adj_shear_se_20plus	adj_shear_se_20minus	DNE_sample	OPCR_sample	Slope_sample
46	Pantodonta	Guichilambda	zhaii	Late Paleocene	C	M2_	v12037.3_RM2_.ply	605.619	605.619	605.619	383.936	221.683	343.499	236.859	62.8176	62.8176	62.8176	310.12	310.12	310.12	278	301	313	328	328	307	315	311	NA	NA	NA	NA	NA	NA	4.73e-06	2.12e-06	580.357	33681.4	580.357	1160.71	4.73e-06	4.73e-06	4.73e-06	2.12e-06	2.12e-06	2.12e-06	0	0	0
45	Pantodonta	Guichilambda	zhaii	Late Paleocene	C	M1_	v12037.3_RM1_.ply	524.145	524.145	524.145	333.163	190.982	283.923	225.822	62.6099	62.6099	62.6099	230.38	230.38	230.38	215	226	235	226	225	230	254	232	NA	NA	NA	NA	NA	NA	3.7e-06	3.86e-06	509.745	25984	509.745	1019.49	4.43691e-06	4.43691e-06	4.43691e-06	4.62878e-06	4.62878e-06	4.62878e-06	0	0	0
42	Pantodonta	Guichilambda	zhaii	Late Paleocene	C	M_2	v12037.2_Lm2.ply	734.488	734.488	734.488	452.578	281.91	258.758	173.314	64.1616	64.1616	64.1616	335.5	335.5	335.5	330	351	358	342	343	323	319	318	0.5788	0.5788	0.5788	443.955	139.505	0.038	3.51e-06	4.05e-06	432.071	18668.5	432.071	864.142	5.30522e-06	5.30522e-06	5.30522e-06	6.12141e-06	6.12141e-06	6.12141e-06	0	0	0
48	Pantodonta	Guichilambda	zhaii	Late Paleocene	C	P4_	v12037.3_RP4_.ply	503.436	503.436	503.436	307.597	195.839	246.041	170.987	59.3705	59.3705	59.3705	206.5	206.5	206.5	219	220	204	193	199	200	204	213	0.3701	0.3701	0.3701	420.259	200.458	0.043	3.52e-06	4.15e-06	417.028	17391.2	417.028	834.056	5.59094e-06	5.59094e-06	5.59094e-06	6.59159e-06	6.59159e-06	6.59159e-06	0	0	0
101	Pantodonta	Pseudanisonchus	antelios	Middle Paleocene	B	M2_	V5041_RM2.ply	679.347	679.347	679.347	320.856	358.49	320.807	95.5981	68.1705	68.1705	68.1705	172.62	172.62	172.62	176	187	172	176	176	168	161	165	NA	NA	NA	NA	NA	NA	4.7e-06	3.77e-06	416.405	17339.3	416.405	832.81	7.48081e-06	7.48081e-06	7.48081e-06	6.00057e-06	6.00057e-06	6.00057e-06	0	0	0
41	Pantodonta	Guichilambda	zhaii	Late Paleocene	C	M_1	v12037.2_Lm1.ply	700.776	700.776	700.776	428.233	272.544	225.799	152.935	66.1636	66.1636	66.1636	256.38	256.38	256.38	259	264	255	259	265	252	244	253	0.5864	0.5864	0.5864	380.731	117.828	0.031	5.76e-06	5.94e-06	378.734	14343.9	378.734	757.468	1.04695e-05	1.04695e-05	1.04695e-05	1.07967e-05	1.07967e-05	1.07967e-05	0	0	0
83	Pantodonta	Hypsilolambda	chalingensis	Early Paleocene	A	M1_	V4861_LM1.ply	298.271	298.271	298.271	207.811	90.4593	240.026	125.776	69.0348	69.0348	69.0348	126.75	126.75	126.75	137	137	125	123	125	130	120	117	0.6939	0.6939	0.6939	369.166	92.1614	0.032	4.47e-06	2.7e-06	365.801	13381	365.801	731.602	8.52978e-06	8.52978e-06	8.52978e-06	5.15222e-06	5.15222e-06	5.15222e-06	0	0	0
84	Pantodonta	Hypsilolambda	chalingensis	Early Paleocene	A	M2_	V4861_LM2.ply	418.39	418.39	418.39	272.779	145.611	214.738	132.256	60.5004	60.5004	60.5004	180	180	180	159	150	174	180	193	207	192	185	0.6597	0.6597	0.6597	350.795	93.7679	0.023	4e-06	5.34e-06	346.994	12040.5	346.994	693.988	8.21831e-06	8.21831e-06	8.21831e-06	1.09714e-05	1.09714e-05	1.09714e-05	0	0	0
47	Pantodonta	Guichilambda	zhaii	Late Paleocene	C	P3_	v12037.3_RP3_.ply	567.768	567.768	567.768	326.912	240.856	171.725	160.202	61.7813	61.7813	61.7813	229.12	229.12	229.12	220	226	221	239	247	228	229	223	0.4018	0.4018	0.4018	334.941	149.959	0.059	2.1e-06	1.33e-06	331.927	11017.6	331.927	663.854	4.59127e-06	4.59127e-06	4.59127e-06	2.90781e-06	2.90781e-06	2.90781e-06	0	0	0
88	Pantodonta	Hypsilolambda	chalingensis	Early Paleocene	A	M3_	V4861_RM3.ply	528.044	528.044	528.044	338.234	189.811	189.481	123.746	66.7012	66.7012	66.7012	203.5	203.5	203.5	197	196	208	212	207	201	205	202	0.4718	0.4718	0.4718	313.227	121.922	0.075	1.16e-05	9.06e-06	313.227	9811.12	313.227	626.454	2.75061e-05	2.75061e-05	2.75061e-05	2.14832e-05	2.14832e-05	2.14832e-05	0	0	0
104	Pantodonta	Altilambda	pactus	Early Paleocene	A	M_2	V5228_Rm2.ply	546.873	546.873	546.873	380.522	166.351	182.812	124.95	66.5702	66.5702	66.5702	244.75	244.75	244.75	233	242	265	233	246	248	242	249	0.5678	0.5678	0.5678	308.684	99.1626	0.153	6.47e-06	3.87e-06	307.761	9471.68	307.761	615.522	1.57246e-05	1.57246e-05	1.57246e-05	9.40557e-06	9.40557e-06	9.40557e-06	0	0	0
44	Pantodonta	Guichilambda	zhaii	Late Paleocene	C	P_4	v12037.2_Lp4.ply	463.788	463.788	463.788	310.638	153.15	195.715	108.56	68.712	68.712	68.712	183.5	183.5	183.5	190	192	184	178	186	178	176	184	0.5192	0.5192	0.5192	306.418	108.473	0.032	4.67e-06	7.63e-06	304.276	9258.39	304.276	608.552	1.15323e-05	1.15323e-05	1.15323e-05	1.88418e-05	1.88418e-05	1.88418e-05	0	0	0
87	Pantodonta	Hypsilolambda	chalingensis	Early Paleocene	A	M2_	V4861_RM2.ply	388.647	388.647	388.647	264.41	124.237	184.151	118.072	65.713	65.713	65.713	139.5	139.5	139.5	129	143	149	145	135	148	134	133	0.4508	0.4508	0.4508	306.928	124.598	0.058	3.94e-06	4.41e-06	302.223	9133.87	302.223	604.446	9.82225e-06	9.82225e-06	9.82225e-06	1.09939e-05	1.09939e-05	1.09939e-05	0	0	0
85	Pantodonta	Hypsilolambda	chalingensis	Early Paleocene	A	M3_	V4861_LM3.ply	404.823	404.823	404.823	272.582	132.241	193.269	104.715	63.2842	63.2842	63.2842	157.38	157.38	157.38	172	167	155	164	152	151	142	156	0.4108	0.4108	0.4108	297.985	131.021	0.016	4.43e-06	8.07e-06	297.985	8879.51	297.985	595.97	1.12643e-05	1.12643e-05	1.12643e-05	2.05199e-05	2.05199e-05	2.05199e-05	0	0	0
86	Pantodonta	Hypsilolambda	chalingensis	Early Paleocene	A	M1_	V4861_RM1.ply	367.824	367.824	367.824	257.189	110.635	164.598	119.792	69.2385	69.2385	69.2385	134.75	134.75	134.75	127	128	126	129	141	144	135	148	0.5445	0.5445	0.5445	287.915	96.9046	0.02	6.06e-06	5.42e-06	284.39	8087.77	284.39	568.78	1.645e-05	1.645e-05	1.645e-05	1.47127e-05	1.47127e-05	1.47127e-05	0	0	0
70	Pantodonta	Bemalambda	Nanhsiungensis	Early Paleocene	A	M3_	V4116_RM3.ply	474.686	474.686	474.686	191.695	282.99	165.264	106.764	62.6694	62.6694	62.6694	155.62	155.62	155.62	162	153	154	167	150	159	153	147	0.3498	0.3498	0.3498	272.029	135.152	0.041	4.53e-06	4.63e-06	272.029	7399.98	272.029	544.058	1.30861e-05	1.30861e-05	1.30861e-05	1.3375e-05	1.3375e-05	1.3375e-05	0	0	0
43	Pantodonta	Guichilambda	zhaii	Late Paleocene	C	P_3	v12037.2_Lp3.ply	290.54	290.54	290.54	212.114	78.4262	173.083	91.922	71.735	71.735	71.735	102.62	102.62	102.62	99	105	111	109	111	95	99	92	0.5457	0.5457	0.5457	266.627	89.5264	0.02	6.16e-06	5.89e-06	265.005	7022.77	265.005	530.01	1.84586e-05	1.84586e-05	1.84586e-05	1.76495e-05	1.76495e-05	1.76495e-05	0	0	0
64	Pantodonta	Bemalambda	Nanhsiungensis	Early Paleocene	A	M2_	V4116_LM2.ply	362.493	362.493	362.493	177.252	185.241	162.537	97.8788	54.551	54.551	54.551	160.38	160.38	160.38	158	155	162	159	165	162	164	158	0.5065	0.5065	0.5065	260.472	94.5809	0.02	4.83e-06	1.13e-05	260.416	6781.65	260.416	520.832	1.48315e-05	1.48315e-05	1.48315e-05	3.4699e-05	3.4699e-05	3.4699e-05	0	0	0
91	Pantodonta	Harpyodus	decorus	Middle Paleocene	B	M2_	V5035.1_LM2.ply	330.75	330.75	330.75	203.23	127.519	16514.2	9001.77	56.2599	56.2599	56.2599	117.5	117.5	117.5	120	117	117	115	111	122	120	118	0.3129	0.3129	0.3129	25516	13647.8	0.092	4.97e-06	7.4e-06	255.16	6510.66	255.16	510.32	1.57033e-05	1.57033e-05	1.57033e-05	2.33812e-05	2.33812e-05	2.33812e-05	0	0	0
67	Pantodonta	Bemalambda	Nanhsiungensis	Early Paleocene	A	P4_	V4116_LP4.ply	276.262	276.262	276.262	171.689	104.573	154.253	97.4191	62.2929	62.2929	62.2929	86.12	86.12	86.12	89	79	85	96	92	93	77	78	0.4073	0.4073	0.4073	251.673	111.454	0.002	4.11e-06	7.17e-06	251.673	6333.93	251.673	503.346	1.32387e-05	1.32387e-05	1.32387e-05	2.30952e-05	2.30952e-05	2.30952e-05	0	0	0
69	Pantodonta	Bemalambda	Nanhsiungensis	Early Paleocene	A	M2_	V4116_RM2.ply	479.926	479.926	479.926	229.683	250.243	155.105	88.6408	61.5105	61.5105	61.5105	134.75	134.75	134.75	132	131	138	142	135	135	137	128	0.5248	0.5248	0.5248	243.74	85.334	0.01	4.2e-06	7.7e-06	243.746	5941.21	243.746	487.492	1.41485e-05	1.41485e-05	1.41485e-05	2.59389e-05	2.59389e-05	2.59389e-05	0	0	0
89	Pantodonta	Hypsilolambda	chalingensis	Early Paleocene	A	P3_	V4861_RP3.ply	317.259	317.259	317.259	218.136	99.1223	159.819	82.1859	73.3674	73.3674	73.3674	98.62	98.62	98.62	102	105	95	93	104	99	98	93	0.6615	0.6615	0.6615	244.843	65.2044	0.018	3.82e-06	4.76e-06	242.005	5856.64	242.005	484.01	1.29982e-05	1.29982e-05	1.29982e-05	1.61967e-05	1.61967e-05	1.61967e-05	0	0	0
90	Pantodonta	Harpyodus	decorus	Middle Paleocene	B	M1_	V5035.1_LM1.ply	275.22	275.22	275.22	188.097	87.1234	15670.8	7937.92	58.6084	58.6084	58.6084	108.38	108.38	108.38	113	107	107	102	107	109	112	110	0.3345	0.3345	0.3345	23608.7	12093	0.034	7.88e-06	7.94e-06	236.087	5573.71	236.087	472.174	2.77587e-05	2.77587e-05	2.77587e-05	2.797e-05	2.797e-05	2.797e-05	0	0	0
63	Pantodonta	Bemalambda	Nanhsiungensis	Early Paleocene	A	M1_	V4116_LM1.ply	185.6	185.6	185.6	126.759	58.8404	142.835	89.5592	55.8846	55.8846	55.8846	114.88	114.88	114.88	112	116	112	112	124	120	114	109	0.3068	0.3068	0.3068	232.394	125.82	0.01	3.68e-06	7.09e-06	232.394	5400.7	232.394	464.788	1.32528e-05	1.32528e-05	1.32528e-05	2.55332e-05	2.55332e-05	2.55332e-05	0	0	0
92	Pantodonta	Harpyodus	decorus	Middle Paleocene	B	M3_	V5035.1_LM3.ply	334.142	334.142	334.142	209.316	124.826	15880.2	7254.34	62.2518	62.2518	62.2518	104.62	104.62	104.62	109	114	105	108	105	100	101	95	0.3962	0.3962	0.3962	23134.5	10473.4	0.039	5.29e-06	7.09e-06	231.346	5352.1	231.346	462.692	1.91718e-05	1.91718e-05	1.91718e-05	2.56952e-05	2.56952e-05	2.56952e-05	0	0	0
103	Pantodonta	Altilambda	pactus	Early Paleocene	A	M_1	V5228_Rm1.ply	410.466	410.466	410.466	277.779	132.686	130.212	93.2529	61.4196	61.4196	61.4196	193.5	193.5	193.5	186	175	189	192	189	204	213	200	0.562	0.562	0.562	223.999	72.794	0.068	5.71e-06	4.63e-06	223.465	4993.66	223.465	446.93	2.17228e-05	2.17228e-05	2.17228e-05	1.76141e-05	1.76141e-05	1.76141e-05	0	0	0
166	Pantodonta	Pastoralodon	lacustris	Late Paleocene	C	M2_	V5481_RM2_.ply	742.324	1039.25	445.394	463.78	278.543	120.992	99.2537	60.7621	63.8002	57.724	267	352.44	181.56	269	257	252	279	273	267	258	281	0.384912	0.508084	0.26174	220.246	101.995	0.032	2.73e-06	2.18e-06	220.246	4850.83	220.246	440.492	1.0599e-05	1.48386e-05	6.3594e-06	8.46367e-06	1.01564e-05	6.77093e-06	0	0	0
95	Pantodonta	Harpyodus	decorus	Middle Paleocene	B	M1_	V5035.1_RM1.ply	248.051	248.051	248.051	160.184	87.8667	13736.5	8253.42	56.9923	56.9923	56.9923	85.25	85.25	85.25	90	87	83	86	87	86	76	87	0.3229	0.3229	0.3229	21989.9	11527.3	0.029	8.81e-06	8.04e-06	219.899	4835.56	219.899	439.798	3.42797e-05	3.42797e-05	3.42797e-05	3.12836e-05	3.12836e-05	3.12836e-05	0	0	0
102	Pantodonta	Altilambda	pactus	Early Paleocene	A	M_1	V5228_Lm1.ply	405.819	405.819	405.819	281.77	124.049	130.102	89.7614	67.4319	67.4319	67.4319	178.5	178.5	178.5	193	180	164	173	176	178	186	178	0.295	0.295	0.295	220.499	122.223	0.161	7.62e-06	5.42e-06	219.863	4833.97	219.863	439.726	2.96562e-05	2.96562e-05	2.96562e-05	2.1094e-05	2.1094e-05	2.1094e-05	0	0	0
96	Pantodonta	Harpyodus	decorus	Middle Paleocene	B	M2_	V5035.1_RM2.ply	280.065	280.065	280.065	175.433	104.632	12862.7	8665.22	54.4261	54.4261	54.4261	90.88	90.88	90.88	90	97	90	88	90	90	88	94	0.2962	0.2962	0.2962	21527.9	11904.7	0.055	4.78e-06	6.01e-06	215.279	4634.5	215.279	430.558	1.91601e-05	1.91601e-05	1.91601e-05	2.40905e-05	2.40905e-05	2.40905e-05	0	0	0
94	Pantodonta	Harpyodus	decorus	Middle Paleocene	B	P4_	V5035.1_LP4.ply	273.596	273.596	273.596	185.926	87.6698	14010.7	7070.49	62.3843	62.3843	62.3843	89.38	89.38	89.38	87	81	85	83	92	88	105	94	0.4019	0.4019	0.4019	21081.2	9437.08	0.07	8.67e-06	7.09e-06	210.812	4444.17	210.812	421.624	3.57881e-05	3.57881e-05	3.57881e-05	2.92662e-05	2.92662e-05	2.92662e-05	0	0	0
165	Pantodonta	Pastoralodon	lacustris	Late Paleocene	C	M1_	V5481_RM1_.ply	602.893	844.05	361.736	381.68	221.213	122.31	87.2934	62.5758	65.7046	59.447	250.12	330.158	170.082	246	257	268	254	253	246	226	251	0.410615	0.542012	0.279218	209.604	92.2026	0.023	2.12e-06	1.72e-06	209.604	4393.38	209.604	419.208	8.82165e-06	1.23503e-05	5.29299e-06	7.15719e-06	8.58862e-06	5.72575e-06	0	0	0
72	Pantodonta	Bemalambda	Nanhsiungensis	Early Paleocene	A	P4_	V4116_RP4.ply	445.058	445.058	445.058	154.9	290.158	127.771	80.9171	63.4935	63.4935	63.4935	108.25	108.25	108.25	107	120	112	101	100	105	109	112	NA	NA	NA	NA	NA	NA	3.38e-06	4.35e-06	208.688	4355.07	208.688	417.376	1.41512e-05	1.41512e-05	1.41512e-05	1.82124e-05	1.82124e-05	1.82124e-05	0	0	0
66	Pantodonta	Bemalambda	Nanhsiungensis	Early Paleocene	A	P3_	V4116_LP3.ply	276.058	276.058	276.058	155.348	120.71	127.601	76.2293	61.6486	61.6486	61.6486	93.88	93.88	93.88	101	100	91	99	97	89	88	86	0.4051	0.4051	0.4051	203.83	90.6512	0.002	4.99e-06	8.24e-06	203.83	4154.67	203.83	407.66	2.15923e-05	2.15923e-05	2.15923e-05	3.56554e-05	3.56554e-05	3.56554e-05	0	0	0
100	Pantodonta	Harpyodus	decorus	Middle Paleocene	B	P4_	V5035.1_RP4.ply	284.726	284.726	284.726	196.764	87.9616	12571.8	7611.41	60.3756	60.3756	60.3756	94	94	94	87	93	92	86	91	99	105	99	0.3789	0.3789	0.3789	20183.2	9459.81	0.026	7.09e-06	8.66e-06	201.832	4073.62	201.832	403.664	3.11052e-05	3.11052e-05	3.11052e-05	3.79931e-05	3.79931e-05	3.79931e-05	0	0	0
65	Pantodonta	Bemalambda	Nanhsiungensis	Early Paleocene	A	M3_	V4116_LM3.ply	537.752	537.752	537.752	207.485	330.267	121.993	73.6608	61.6961	61.6961	61.6961	151.75	151.75	151.75	132	151	156	163	160	155	157	140	0.3947	0.3947	0.3947	195.654	88.843	0.003	3.79e-06	7.95e-06	195.654	3828.05	195.654	391.308	1.73671e-05	1.73671e-05	1.73671e-05	3.64298e-05	3.64298e-05	3.64298e-05	0	0	0
93	Pantodonta	Harpyodus	decorus	Middle Paleocene	B	P3_	V5035.1_LP3.ply	210.534	210.534	210.534	165.767	44.7662	12801.8	5997.84	69.6649	69.6649	69.6649	66.12	66.12	66.12	64	66	60	64	66	65	70	74	0.5048	0.5048	0.5048	18799.6	6850.54	0.124	1.54e-05	1.22e-05	187.996	3534.25	187.996	375.992	7.46253e-05	7.46253e-05	7.46253e-05	5.91187e-05	5.91187e-05	5.91187e-05	0	0	0
97	Pantodonta	Harpyodus	decorus	Middle Paleocene	B	M3_	V5035.1_RM3.ply	268.711	268.711	268.711	180.488	88.223	11299.3	6784.53	59.8309	59.8309	59.8309	110	110	110	102	115	119	108	116	103	109	108	0.3887	0.3887	0.3887	18083.8	8311.69	0.024	9.01e-06	6.56e-06	180.839	3270.27	180.839	361.678	4.60988e-05	4.60988e-05	4.60988e-05	3.35636e-05	3.35636e-05	3.35636e-05	0	0	0
68	Pantodonta	Bemalambda	Nanhsiungensis	Early Paleocene	A	M1_	V4116_RM1.ply	250.734	250.734	250.734	128.96	121.774	114.48	65.913	58.9427	58.9427	58.9427	106.88	106.88	106.88	105	101	98	106	118	112	108	107	0.5223	0.5223	0.5223	180.368	63.4549	0.014	3.55e-06	6.19e-06	180.393	3254.16	180.393	360.786	1.82261e-05	1.82261e-05	1.82261e-05	3.17802e-05	3.17802e-05	3.17802e-05	0	0	0
167	Pantodonta	Pastoralodon	lacustris	Late Paleocene	C	M3_	V5481_RM3_.ply	630.437	882.612	378.262	433.402	197.035	93.2453	77.6088	63.8176	67.0085	60.6267	236.75	312.51	160.99	234	220	235	241	246	231	238	249	0.428109	0.565104	0.291114	170.854	72.5729	0.034	2.99e-06	3.51e-06	170.854	2919.11	170.854	341.708	1.65642e-05	2.31898e-05	9.93849e-06	1.94449e-05	2.33339e-05	1.55559e-05	0	0	0
99	Pantodonta	Harpyodus	decorus	Middle Paleocene	B	P3_	V5035.1_RP3.ply	263.788	263.788	263.788	194.964	68.8242	11719.2	5255.12	66.1171	66.1171	66.1171	73.12	73.12	73.12	69	69	75	75	75	75	76	71	0.4479	0.4479	0.4479	16974.3	6929.87	0.043	8.83e-06	1.18e-05	169.743	2881.27	169.743	339.486	4.93657e-05	4.93657e-05	4.93657e-05	6.597e-05	6.597e-05	6.597e-05	0	0	0
71	Pantodonta	Bemalambda	Nanhsiungensis	Early Paleocene	A	P3_	V4116_RP3.ply	177.828	177.828	177.828	125.676	52.1527	91.3569	60.0669	62.8014	62.8014	62.8014	125.5	125.5	125.5	133	122	124	123	124	126	129	123	0.3701	0.3701	0.3701	151.424	72.2329	0.004	9e-06	6.99e-06	151.424	2292.92	151.424	302.848	5.90396e-05	5.90396e-05	5.90396e-05	4.58541e-05	4.58541e-05	4.58541e-05	0	0	0
168	Pantodonta	Pastoralodon	lacustris	Late Paleocene	C	P4_	V5481_RP4_.ply	654.658	916.522	392.795	377.686	276.972	80.8874	56.6293	69.0281	72.4795	65.5767	201.62	266.138	137.102	201	199	190	203	197	210	216	197	0.526558	0.695057	0.358059	137.517	47.9726	0.07	2.47e-06	3.2e-06	137.517	1891.09	137.517	275.034	1.85426e-05	2.59597e-05	1.11256e-05	2.40228e-05	2.88274e-05	1.92183e-05	0	0	0
138	Pantodonta	Bemalambda	Nanhsiungensis	Early Paleocene	A	M_3	V4132_Rm3.ply	580.182	812.255	348.109	391.677	188.505	71.4815	42.3382	74.7859	78.5252	71.0466	184.25	243.21	125.29	188	199	193	185	170	178	174	187	0.535175	0.706431	0.363919	113.82	39.0275	0.075	5.47e-06	5.82e-06	113.82	1295.5	113.82	227.64	5.35124e-05	7.49174e-05	3.21075e-05	5.69364e-05	6.83237e-05	4.55491e-05	0	0	0
105	Pantodonta	Altilambda	tenuis	Early Paleocene	A	M1_	V5230_LM1.ply	349.875	349.875	349.875	247.118	102.757	62.897	37.4355	62.3695	62.3695	62.3695	184.75	184.75	184.75	190	175	178	179	185	180	198	193	0.416295	0.416295	0.416295	100.333	43.6368	0.002	1.62e-06	2.73e-06	100.333	1006.67	100.333	200.666	1.89089e-05	1.89089e-05	1.89089e-05	3.18651e-05	3.18651e-05	3.18651e-05	0	0	0
106	Pantodonta	Altilambda	tenuis	Early Paleocene	A	M_1	V5231_Lm1.ply	555.072	555.072	555.072	412.131	142.942	65.3808	34.7968	71.8379	71.8379	71.8379	212	212	212	204	205	203	216	215	230	213	210	0.578861	0.578861	0.578861	100.178	31.4759	0.002	3.72e-06	2.26e-06	100.178	1003.56	100.178	200.356	4.35146e-05	4.35146e-05	4.35146e-05	2.64363e-05	2.64363e-05	2.64363e-05	0	0	0
125	Pantodonta	Plethorodon	chienshanensis	Early Paleocene	A	M2_	V8304_RM2.ply	219.071	219.071	219.071	158.484	60.5879	57.4724	36.3279	50.5904	50.5904	50.5904	114	114	114	118	117	118	117	107	117	107	111	0.252725	0.252725	0.252725	93.8003	56.5835	0.024	3.54e-06	3.92e-06	93.8003	879.85	93.8003	187.601	4.54036e-05	4.54036e-05	4.54036e-05	5.02775e-05	5.02775e-05	5.02775e-05	0	0	0
215	Anagalida	Yangtanglestes	rotundus	Early Paleocene	A	P_4	UCMP124793_RP_4.ply	486.374	680.923	291.824	302.635	183.739	67.3921	25.5948	71.9585	75.5564	68.3606	124.25	164.01	84.49	130	124	99	120	133	120	125	143	0.56615	0.747318	0.384982	92.9868	29.9686	0.032	2.5e-06	6.61e-06	92.9868	864.654	92.9868	185.974	3.24581e-05	4.54414e-05	1.94749e-05	8.58193e-05	0.000102983	6.86554e-05	0	0	0
133	Pantodonta	Bemalambda	Nanhsiungensis	Early Paleocene	A	M3_	V4124_RM3_.ply	312.233	437.126	187.34	219.831	92.402	57.976	34.6181	70.392	73.9116	66.8724	111.75	147.51	75.99	107	106	103	114	123	127	104	110	0.551385	0.727828	0.374942	92.5942	30.7367	0.071	3.65e-06	7.56e-06	92.5942	857.369	92.5942	185.188	4.76704e-05	6.67386e-05	2.86022e-05	9.87365e-05	0.000118484	7.89892e-05	0	0	0
124	Pantodonta	Plethorodon	chienshanensis	Early Paleocene	A	M1_	V8304_RM1.ply	218.101	218.101	218.101	153.083	65.018	57.0821	34.5357	50.6662	50.6662	50.6662	138.38	138.38	138.38	146	142	133	131	137	140	139	139	0.257164	0.257164	0.257164	91.6177	54.7784	0.036	2.88e-06	2.17e-06	91.6177	839.38	91.6177	183.235	3.81764e-05	3.81764e-05	3.81764e-05	2.87648e-05	2.87648e-05	2.87648e-05	0	0	0
214	Anagalida	Yangtanglestes	rotundus	Early Paleocene	A	P_3	UCMP124793_RP_3.ply	388.311	543.636	232.987	242.413	145.898	64.2197	24.9148	76.1108	79.9164	72.3053	108	142.56	73.44	104	104	114	110	107	100	110	115	0.67243	0.887608	0.457252	89.1345	23.2261	0.007	2.8e-06	1.48e-05	89.1345	794.496	89.1345	178.269	3.85716e-05	5.40002e-05	2.31429e-05	0.000203878	0.000244654	0.000163103	0	0	0
98	Pantodonta	Harpyodus	decorus	Middle Paleocene	B	P2_	V5035.1_RP2.ply	250.672	250.672	250.672	179.106	71.5657	6565.26	2311.47	72.3789	72.3789	72.3789	52.38	52.38	52.38	49	53	54	49	53	54	56	51	0.783	0.783	0.783	8886.46	1856.34	0.089	1.13e-05	5.69e-06	88.7673	787.963	88.7673	177.535	0.000156566	0.000156566	0.000156566	7.88372e-05	7.88372e-05	7.88372e-05	0	0	0
118	Pantodonta	Plethorodon	chienshanensis	Early Paleocene	A	M2_	V8304_LM2.ply	196.157	196.157	196.157	143.693	52.4637	56.7832	31.6381	50.3786	50.3786	50.3786	129.38	129.38	129.38	142	135	126	122	114	131	136	129	0.261106	0.261106	0.261106	88.4213	52.4521	0.01	3.57e-06	2.67e-06	88.4213	781.833	88.4213	176.843	4.9735e-05	4.9735e-05	4.9735e-05	3.71967e-05	3.71967e-05	3.71967e-05	0	0	0
117	Pantodonta	Plethorodon	chienshanensis	Early Paleocene	A	M1_	V8304_LM1.ply	180.966	180.966	180.966	129.163	51.8027	49.9538	35.6584	48.854	48.854	48.854	92.25	92.25	92.25	88	90	100	99	90	91	88	92	0.3996	0.3996	0.3996	85.799	38.582	0.019	1.93e-06	2.14e-06	85.6122	732.945	85.6122	171.224	2.81307e-05	2.81307e-05	2.81307e-05	3.11916e-05	3.11916e-05	3.11916e-05	0	0	0
130	Pantodonta	Plethorodon	chienshanensis	Early Paleocene	A	P4_	V8304_RP4.ply	189.955	189.955	189.955	134.172	55.7831	48.4001	27.5586	54.5327	54.5327	54.5327	76.62	76.62	76.62	71	72	78	83	78	79	73	79	0.4271	0.4271	0.4271	76.1616	32.413	0.102	2.5e-06	4.65e-06	75.9587	576.972	75.9587	151.917	4.30829e-05	4.30829e-05	4.30829e-05	8.01342e-05	8.01342e-05	8.01342e-05	0	0	0
137	Pantodonta	Bemalambda	Nanhsiungensis	Early Paleocene	A	M_2	V4132_Rm2.ply	536.073	750.502	321.644	349.107	186.966	45.8439	27.5374	72.5203	76.1463	68.8943	171	225.72	116.28	177	171	174	167	171	166	163	179	0.502525	0.663333	0.341717	73.3813	26.8595	0.132	5.06e-06	5.1e-06	73.3813	538.482	73.3813	146.763	9.15175e-05	0.000128125	5.49105e-05	9.2241e-05	0.000110689	7.37928e-05	0	0	0
132	Pantodonta	Bemalambda	Nanhsiungensis	Early Paleocene	A	M2_	V4124_RM2_.ply	286.449	401.028	171.869	215.209	71.2396	43.8506	28.8474	64.2927	67.5074	61.0781	134.12	177.038	91.2016	121	132	131	147	140	143	135	124	0.444362	0.586558	0.302166	72.698	29.892	0.04	2e-06	4.6e-06	72.698	528.5	72.698	145.396	3.66498e-05	5.13098e-05	2.19899e-05	8.42946e-05	0.000101154	6.74357e-05	0	0	0
135	Pantodonta	Bemalambda	Nanhsiungensis	Early Paleocene	A	P4_	V4124_RP4_.ply	365.825	512.155	219.495	264.006	101.819	46.3203	25.774	71.1755	74.7342	67.6167	115.25	152.13	78.37	117	105	102	115	117	124	113	129	0.585075	0.7723	0.397851	72.0944	22.3723	0.025	2.43e-06	4.09e-06	72.0944	519.76	72.0944	144.189	4.50523e-05	6.30733e-05	2.70314e-05	7.58289e-05	9.09946e-05	6.06631e-05	0	0	0
129	Pantodonta	Plethorodon	chienshanensis	Early Paleocene	A	P3_	V8304_RP3.ply	192.833	192.833	192.833	149.29	43.5428	46.701	24.3209	59.6584	59.6584	59.6584	66.88	66.88	66.88	61	63	79	68	68	66	69	61	0.4654	0.4654	0.4654	71.1994	28.0691	0.037	2.63e-06	3.53e-06	71.0219	504.411	71.0219	142.044	4.97943e-05	4.97943e-05	4.97943e-05	6.68342e-05	6.68342e-05	6.68342e-05	0	0	0
123	Pantodonta	Plethorodon	chienshanensis	Early Paleocene	A	P4_	V8304_LP4.ply	177.159	177.159	177.159	122.711	54.4482	44.6568	25.3937	53.2621	53.2621	53.2621	77.62	77.62	77.62	74	82	82	81	77	76	72	77	0.413	0.413	0.413	70.208	30.7359	0.011	2.76e-06	3.5e-06	70.0505	490.707	70.0505	140.101	5.32729e-05	5.32729e-05	5.32729e-05	6.75563e-05	6.75563e-05	6.75563e-05	0	0	0
131	Pantodonta	Bemalambda	Nanhsiungensis	Early Paleocene	A	M1_	V4124_RM1_.ply	286.861	401.605	172.117	206.961	79.8995	41.3596	25.5361	66.7472	70.0846	63.4099	140.12	184.958	95.2816	128	139	143	131	141	143	149	147	0.494608	0.652883	0.336334	66.8957	24.8764	0.075	2.64e-06	6.9e-06	66.8957	447.503	66.8957	133.791	5.43525e-05	7.60935e-05	3.26115e-05	0.000142058	0.000170469	0.000113646	0	0	0
122	Pantodonta	Plethorodon	chienshanensis	Early Paleocene	A	P3_	V8304_LP3.ply	196.363	196.363	196.363	133.562	62.8009	39.4538	25.844	55.9824	55.9824	55.9824	79.62	79.62	79.62	79	81	80	74	84	81	75	83	0.4259	0.4259	0.4259	65.4889	27.9393	0.033	2.38e-06	4.56e-06	65.2978	426.38	65.2978	130.596	5.06865e-05	5.06865e-05	5.06865e-05	9.71136e-05	9.71136e-05	9.71136e-05	0	0	0
181	Anagalida	Hsiuannania	tabiensis	Late Paleocene	C	M_2	UCMP124734_RM_2.ply	250.976	351.366	150.586	160.283	90.6933	43.3589	19.9476	71.1091	74.6646	67.5537	136.38	180.022	92.7384	135	142	132	139	141	139	125	138	0.58811	0.776305	0.399915	63.3065	19.5262	0.011	1.36e-06	3.95e-06	63.3065	400.771	63.3065	126.613	3.02472e-05	4.2346e-05	1.81483e-05	8.78502e-05	0.00010542	7.02802e-05	0	0	0
50	Pantodonta	Harpyodus	progressus	Late Paleocene	C	M1_	v12664_LM1_.ply	568.413	568.413	568.413	378.479	189.934	40.1439	22.6444	93.511	93.511	93.511	168.5	168.5	168.5	165	173	191	175	149	159	165	171	NA	NA	NA	NA	NA	NA	2.82e-06	1.32e-06	62.7883	394.237	62.7883	125.577	6.34442e-05	6.34442e-05	6.34442e-05	2.96973e-05	2.96973e-05	2.96973e-05	0	0	0
191	Anagalida	Haltictops	mirabilis	Middle Paleocene	B	M_3	UCMP124741_LM_3.ply	477.175	668.045	286.305	315.031	162.144	39.043	22.6571	75.5	79.275	71.725	185.5	244.86	126.14	201	185	180	179	180	180	173	206	0.70289	0.927815	0.477965	61.7001	15.1273	0.004	2.54e-06	3.1e-06	61.7001	380.69	61.7001	123.4	5.85608e-05	8.19851e-05	3.51365e-05	7.14718e-05	8.57662e-05	5.71775e-05	0	0	0
200	Anagalida	Anictops	tabienpedis	Late Paleocene	C	M2_	UCMP124761_LM2_.ply	423.964	593.55	254.378	267.418	156.546	33.6819	27.2467	63.8559	67.0487	60.6631	211.12	278.678	143.562	216	206	213	213	192	201	223	225	0.4628	0.610896	0.314704	60.9286	24.1456	0.006	2.28e-06	2.95e-06	60.9286	371.229	60.9286	121.857	5.35006e-05	7.49008e-05	3.21003e-05	6.92222e-05	8.30667e-05	5.53778e-05	0	0	0
190	Anagalida	Haltictops	mirabilis	Middle Paleocene	B	M_2	UCMP124741_LM_2.ply	489.599	685.439	293.76	338.192	151.407	39.9449	20.8583	77.8217	81.7128	73.9307	171	225.72	116.28	180	188	172	166	169	163	164	166	0.73137	0.965408	0.497332	60.8031	14.082	0.003	2.52e-06	3.13e-06	60.8031	369.702	60.8031	121.606	5.93032e-05	8.30244e-05	3.55819e-05	7.36583e-05	8.839e-05	5.89266e-05	0	0	0
199	Anagalida	Anictops	tabienpedis	Late Paleocene	C	M1_	UCMP124761_LM1_.ply	370.7	518.98	222.42	213.461	157.239	32.5318	25.8541	64.6264	67.8577	61.3951	156.75	206.91	106.59	147	151	156	159	163	158	159	161	0.44736	0.590515	0.304205	58.3859	23.8637	0.006	2.1e-06	3.22e-06	58.3859	340.891	58.3859	116.772	5.23072e-05	7.32301e-05	3.13843e-05	8.02044e-05	9.62452e-05	6.41635e-05	0	0	0
204	Anagalida	Anictops	tabienpedis	Late Paleocene	C	P4_	UCMP124761_LP4_.ply	411.833	576.567	247.1	259.254	152.579	30.7648	26.3811	67.9061	71.3014	64.5108	155.25	204.93	105.57	164	154	161	153	143	157	142	168	0.51396	0.678427	0.349493	57.1459	20.444	0.016	2.6e-06	4.41e-06	57.1459	326.565	57.1459	114.292	6.67371e-05	9.3432e-05	4.00423e-05	0.000113196	0.000135836	9.05572e-05	0	0	0
119	Pantodonta	Plethorodon	chienshanensis	Early Paleocene	A	M3_	V8304_LM3.ply	183.094	183.094	183.094	130.279	52.8148	35.5207	20.9948	55.0589	55.0589	55.0589	81.12	81.12	81.12	78	86	80	75	81	78	88	83	0.299208	0.299208	0.299208	56.5155	31.0655	0.028	2.09e-06	3.14e-06	56.5155	319.4	56.5155	113.031	5.4486e-05	5.4486e-05	5.4486e-05	8.18594e-05	8.18594e-05	8.18594e-05	0	0	0
140	Pantodonta	Bemalambda	Nanhsiungensis	Early Paleocene	A	P_4	V4132_Rp4.ply	313.049	438.268	187.829	225.671	87.3782	35.3366	21.1446	75.9724	79.771	72.1738	91.88	121.282	62.4784	83	98	111	99	94	81	89	80	0.623909	0.82356	0.424258	56.4812	16.2175	0.038	3.89e-06	2.35e-06	56.4812	319.013	56.4812	112.962	0.000101498	0.000142097	6.08988e-05	6.13163e-05	7.35795e-05	4.9053e-05	0	0	0
134	Pantodonta	Bemalambda	Nanhsiungensis	Early Paleocene	A	P3_	V4124_RP3_.ply	289.599	405.439	173.759	203.616	85.9833	35.7081	20.5791	69.8037	73.2939	66.3136	81.12	107.078	55.1616	83	80	90	82	86	75	69	84	0.545287	0.719779	0.370795	56.2873	18.9138	0.017	1.88e-06	3.66e-06	56.2873	316.826	56.2873	112.575	4.92897e-05	6.90056e-05	2.95738e-05	9.59577e-05	0.000115149	7.67662e-05	0	0	0
126	Pantodonta	Plethorodon	chienshanensis	Early Paleocene	A	M3_	V8304_RM3.ply	186.247	186.247	186.247	131.935	54.3116	36.6033	19.4136	54.0045	54.0045	54.0045	86.75	86.75	86.75	90	87	87	87	85	92	82	84	0.294096	0.294096	0.294096	56.0169	31.1079	0.012	3.22e-06	3.12e-06	56.0169	313.789	56.0169	112.034	8.49929e-05	8.49929e-05	8.49929e-05	8.23533e-05	8.23533e-05	8.23533e-05	0	0	0
217	Anagalida	Hsiuannania	minor	Middle Paleocene	B	M_3	UCMP124808_RM_3.ply	441.771	618.479	265.062	262.787	178.983	38.2626	17.3985	73.0735	76.7272	69.4198	205.38	271.102	139.658	205	207	206	207	213	204	190	211	0.63214	0.834425	0.429855	55.6611	15.7211	0.008	1.64e-06	2.09e-06	55.6611	309.816	55.6611	111.322	4.36762e-05	6.11467e-05	2.62057e-05	5.56605e-05	6.67926e-05	4.45284e-05	0	0	0
207	Anagalida	Paranictops	majuscula	Late Paleocene	C	M3_	UCMP124762_LM3_.ply	535.64	749.896	321.384	324.345	211.295	35.4232	19.4515	71.0814	74.6354	67.5273	266	351.12	180.88	288	287	266	252	267	260	253	255	0.49184	0.649229	0.334451	54.8747	20.5193	0.01	2.59e-06	2.49e-06	54.8747	301.123	54.8747	109.749	7.03642e-05	9.85099e-05	4.22185e-05	6.76475e-05	8.1177e-05	5.4118e-05	0	0	0
162	Pantodonta	Archaeolambda	tabiensis	Middle Paleocene	B	M_3	V4333_Rm3.ply	411.591	576.228	246.955	278.088	133.504	34.752	19.3848	72.0615	75.6646	68.4585	143.88	189.922	97.8384	137	119	138	152	146	155	151	153	0.588204	0.77643	0.399979	54.1368	16.6949	0.019	1.73e-06	3.32e-06	54.1368	293.079	54.1368	108.274	4.78994e-05	6.70591e-05	2.87396e-05	9.19225e-05	0.000110307	7.3538e-05	0	0	0
188	Anagalida	Haltictops	mirabilis	Middle Paleocene	B	M_3	UCMP124740_RM_3.ply	551.465	772.051	330.879	312.79	238.676	33.7122	18.6133	72.9501	76.5976	69.3026	202.38	267.142	137.618	213	199	195	202	202	194	209	205	0.57154	0.754433	0.388647	52.3255	16.6832	0.006	1.45e-06	2.02e-06	52.3255	273.796	52.3255	104.651	4.21059e-05	5.89482e-05	2.52635e-05	5.86578e-05	7.03894e-05	4.69263e-05	0	0	0
203	Anagalida	Anictops	tabienpedis	Late Paleocene	C	P3_	UCMP124761_LP3_.ply	777.213	1088.1	466.328	401.015	376.198	29.7729	21.3396	66.2605	69.5735	62.9474	214.75	283.47	146.03	216	215	208	207	220	219	223	210	0.46368	0.612058	0.315302	51.1125	20.2201	0.006	1.09e-06	2.36e-06	51.1125	261.249	51.1125	102.225	3.27086e-05	4.5792e-05	1.96252e-05	7.08186e-05	8.49823e-05	5.66549e-05	0	0	0
128	Pantodonta	Plethorodon	chienshanensis	Early Paleocene	A	P2_	V8304_RP2.ply	152.959	152.959	152.959	118.307	34.6521	31.4921	17.521	61.0183	61.0183	61.0183	66	66	66	75	72	68	62	54	56	66	75	0.5048	0.5048	0.5048	49.1027	17.8926	0.011	1.66e-06	4.9e-06	49.0131	240.228	49.0131	98.0262	5.28256e-05	5.28256e-05	5.28256e-05	0.000155931	0.000155931	0.000155931	0	0	0
161	Pantodonta	Archaeolambda	tabiensis	Middle Paleocene	B	M_2	V4333_Rm2.ply	471.033	659.447	282.62	269.12	201.913	32.3254	15.7809	72.8349	76.4767	69.1932	153.12	202.118	104.122	156	146	160	165	152	145	152	149	0.615832	0.812899	0.418766	48.1063	14.0377	0.09	1.64e-06	2.91e-06	48.1063	231.422	48.1063	96.2126	5.35716e-05	7.50002e-05	3.21429e-05	9.50569e-05	0.000114068	7.60455e-05	0	0	0
75	Pantodonta	Yuodon	protoselenoides	Early Paleocene	A	M_3	V4236_Rm3.ply	339.515	339.515	339.515	229.677	109.838	32.642	15.0185	71.4811	71.4811	71.4811	134.12	134.12	134.12	147	138	135	133	125	132	128	135	NA	NA	NA	NA	NA	NA	1.61e-06	2.04e-06	47.6604	227.151	47.6604	95.3208	5.32817e-05	5.32817e-05	5.32817e-05	6.75123e-05	6.75123e-05	6.75123e-05	0	0	0
189	Anagalida	Haltictops	mirabilis	Middle Paleocene	B	P_4	UCMP124740_RP_4.ply	626.059	876.483	375.635	312.299	313.76	29.0125	18.4139	73.1717	76.8303	69.5131	177.88	234.802	120.958	181	183	174	176	171	186	176	176	0.61979	0.818123	0.421457	47.4264	13.7303	0.009	2.4e-06	2.76e-06	47.4264	224.926	47.4264	94.8528	7.99754e-05	0.000111966	4.79852e-05	9.19717e-05	0.000110366	7.35774e-05	0	0	0
74	Pantodonta	Yuodon	protoselenoides	Early Paleocene	A	M_2	V4236_Rm2.ply	NA	NA	NA	610.383	896.831	26.549	20.8588	71.8256	71.8256	71.8256	350	350	350	349	361	371	357	345	333	340	344	NA	NA	NA	NA	NA	NA	1.52e-06	1.31e-06	47.4079	224.751	47.4079	94.8158	5.06788e-05	5.06788e-05	5.06788e-05	4.36771e-05	4.36771e-05	4.36771e-05	0	0	0
187	Anagalida	Haltictops	mirabilis	Middle Paleocene	B	M_2	UCMP124740_RM_2.ply	609.441	853.218	365.665	341.145	268.297	28.2215	19.0298	74.4778	78.2017	70.7539	200.25	264.33	136.17	204	184	198	211	204	208	199	194	0.65362	0.862778	0.444462	42.4823	11.4942	0.008	2.76e-06	1.78e-06	47.2513	223.269	47.2513	94.5026	9.24492e-05	0.000129429	5.54695e-05	5.9623e-05	7.15476e-05	4.76984e-05	0	0	0
154	Anagalida	Wanogale	hodungensis	Early Paleocene	A	M_2	V4273_Rm2.ply	212.128	296.979	127.277	140.067	72.0603	34.4168	12.6639	71.4842	75.0584	67.91	93.25	123.09	63.41	98	90	88	88	104	100	86	92	0.53247	0.70286	0.362079	47.0807	16.231	0.008	2.08e-06	1.94e-06	47.0807	221.659	47.0807	94.1614	7.00256e-05	9.80358e-05	4.20153e-05	6.53123e-05	7.83748e-05	5.22498e-05	0	0	0
185	Anagalida	Hsiuannania	sp	Late Paleocene	C	P_4	UCMP124735_LP_4.ply	229.416	321.182	137.649	167.061	62.355	29.7274	17.2765	70.8445	74.3868	67.3023	120.62	159.218	82.0216	123	125	134	117	116	118	118	114	0.54872	0.72431	0.37313	47.0039	15.6865	0.004	2.6e-06	2.72e-06	47.0039	220.937	47.0039	94.0078	8.77322e-05	0.000122825	5.26393e-05	9.17814e-05	0.000110138	7.34251e-05	0	0	0
136	Pantodonta	Bemalambda	Nanhsiungensis	Early Paleocene	A	M_1	V4132_Rm1.ply	317.941	445.117	190.764	215.696	102.244	27.4816	17.5053	69.5702	73.0487	66.0917	94.38	124.582	64.1784	98	103	96	81	86	99	97	95	0.527025	0.695673	0.358377	44.9869	15.679	0.012	2.52e-06	3.51e-06	44.9869	202.382	44.9869	89.9738	9.04177e-05	0.000126585	5.42506e-05	0.000125939	0.000151127	0.000100751	0	0	0
139	Pantodonta	Bemalambda	Nanhsiungensis	Early Paleocene	A	P_3	V4132_Rp3.ply	254.522	356.331	152.713	201.088	53.4338	28.1118	16.5595	77.1385	80.9954	73.2816	65.5	86.46	44.54	61	67	72	68	64	60	63	69	0.672069	0.887131	0.457007	44.6713	11.6487	0.008	2.83e-06	1.92e-06	44.6713	199.553	44.6713	89.3426	0.000102546	0.000143565	6.15277e-05	6.9572e-05	8.34864e-05	5.56576e-05	0	0	0
121	Pantodonta	Plethorodon	chienshanensis	Early Paleocene	A	P2_	V8304_LP2.ply	151.374	151.374	151.374	113.602	37.7715	28.1712	15.941	58.8838	58.8838	58.8838	70.75	70.75	70.75	71	71	76	71	68	71	70	68	0.35376	0.35376	0.35376	44.1122	21.7414	0.008	1.61e-06	4.04e-06	44.1122	194.589	44.1122	88.2244	5.93768e-05	5.93768e-05	5.93768e-05	0.000148995	0.000148995	0.000148995	0	0	0
202	Anagalida	Anictops	tabienpedis	Late Paleocene	C	P2_	UCMP124761_LP2_.ply	515.169	721.237	309.101	338.091	177.078	25.9905	17.9733	69.8069	73.2973	66.3166	166	219.12	112.88	165	160	163	181	184	168	154	153	0.50366	0.664831	0.342489	43.9638	16.0553	0.006	1.05e-06	1.63e-06	43.9638	193.282	43.9638	87.9276	3.89071e-05	5.447e-05	2.33443e-05	6.03987e-05	7.24784e-05	4.8319e-05	0	0	0
208	Anagalida	Paranictops	majuscula	Late Paleocene	C	P3_	UCMP124762_LP3_.ply	418.427	585.798	251.056	270.634	147.793	26.6485	15.9788	77.1476	81.005	73.2902	162.38	214.342	110.418	151	165	177	166	161	170	158	151	0.60302	0.795986	0.410054	42.6272	12.7618	0.005	2.54e-06	2.03e-06	42.6272	181.708	42.6272	85.2544	9.82756e-05	0.000137586	5.89653e-05	7.85431e-05	9.42517e-05	6.28344e-05	0	0	0
186	Anagalida	Haltictops	mirabilis	Middle Paleocene	B	M_1	UCMP124740_RM_1.ply	540.941	757.318	324.565	313.515	227.426	25.8041	16.6782	75.9432	79.7404	72.1461	191.38	252.622	130.138	199	184	185	196	195	200	185	187	0.65362	0.862778	0.444462	42.4823	11.4942	0.008	3.8e-06	3.82e-06	42.4823	180.475	42.4823	84.9646	0.000147729	0.000206821	8.86374e-05	0.000148506	0.000178208	0.000118805	0	0	0
206	Anagalida	Paranictops	majuscula	Late Paleocene	C	M2_	UCMP124762_LM2_.ply	417.724	584.814	250.634	261.939	155.785	26.7882	15.5663	70.5838	74.113	67.0546	216.62	285.938	147.302	216	214	222	238	213	208	211	211	0.46676	0.616123	0.317397	42.3545	16.6522	0.012	1.67e-06	2.81e-06	42.3545	179.39	42.3545	84.709	6.51974e-05	9.12764e-05	3.91185e-05	0.000109703	0.000131644	8.77628e-05	0	0	0
51	Pantodonta	Harpyodus	progressus	Late Paleocene	C	P4_	v12664_LP4_.ply	508.736	508.736	508.736	310.28	198.456	26.1926	15.7126	63.7121	63.7121	63.7121	224.75	224.75	224.75	235	229	218	218	217	234	239	208	NA	NA	NA	NA	NA	NA	1.67e-06	2.35e-06	41.9052	175.605	41.9052	83.8104	6.61782e-05	6.61782e-05	6.61782e-05	9.3125e-05	9.3125e-05	9.3125e-05	0	0	0
216	Anagalida	Hsiuannania	minor	Middle Paleocene	B	M_2	UCMP124808_RM_2.ply	422.105	590.948	253.263	254.431	167.674	26.4168	14.698	69.8072	73.2976	66.3169	169.62	223.898	115.342	167	186	175	164	167	171	172	155	0.56807	0.749852	0.386288	41.1148	13.2002	0.007	1.17e-06	2.18e-06	41.1148	169.043	41.1148	82.2296	4.7617e-05	6.66638e-05	2.85702e-05	8.87222e-05	0.000106467	7.09778e-05	0	0	0
209	Anagalida	Paranictops	majuscula	Late Paleocene	C	P4_	UCMP124762_LP4_.ply	381.797	534.516	229.078	247.327	134.47	25.3045	14.001	75.6973	79.4822	71.9124	155.12	204.758	105.482	156	156	161	150	147	158	150	163	0.55437	0.731768	0.376972	39.3054	12.9697	0.005	2.91e-06	2.92e-06	39.3054	154.491	39.3054	78.6108	0.000126134	0.000176588	7.56806e-05	0.000126568	0.000151881	0.000101254	0	0	0
160	Pantodonta	Archaeolambda	tabiensis	Middle Paleocene	B	M_1	V4333_Rm1.ply	384.669	538.536	230.801	218.165	166.503	26.2069	12.8926	71.4809	75.0549	67.9068	126.12	166.478	85.7616	134	121	119	122	120	131	132	130	0.593684	0.783663	0.403705	39.0995	11.9262	0.094	1.38e-06	2.63e-06	39.0995	152.877	39.0995	78.199	6.02577e-05	8.43608e-05	3.61546e-05	0.000114839	0.000137807	9.18712e-05	0	0	0
158	Anagalida	Anchilestes	impolitus	Early Paleocene	A	M_3	V4315_Lm3.ply	397.213	556.098	238.328	256.766	140.446	25.668	13.4231	67.7896	71.179	64.4001	140.62	185.618	95.6216	134	131	136	144	138	149	146	147	0.488043	0.644217	0.331869	39.0911	14.7289	0.02	1.77e-06	1.96e-06	39.0911	152.811	39.0911	78.1822	7.73103e-05	0.000108234	4.63862e-05	8.56092e-05	0.000102731	6.84873e-05	0	0	0
157	Anagalida	Anchilestes	impolitus	Early Paleocene	A	M_2	V4315_Lm2.ply	242.634	339.687	145.58	161.279	81.3543	25.4794	12.9936	65.7898	69.0793	62.5003	99.38	131.182	67.5784	101	97	98	101	99	93	105	101	0.378253	0.499294	0.257212	38.473	18.0555	0.039	2.23e-06	3.73e-06	38.473	148.017	38.473	76.946	9.96001e-05	0.00013944	5.97601e-05	0.000166596	0.000199915	0.000133277	0	0	0
180	Anagalida	Hsiuannania	tabiensis	Late Paleocene	C	M_1	UCMP124734_RM_1.ply	240.844	337.182	144.507	132.882	107.962	21.0905	15.6221	58.2031	61.1133	55.293	91.62	120.938	62.3016	98	100	103	81	95	88	86	82	0.33616	0.443731	0.228589	36.7126	18.7428	0.009	1.3e-06	1.57e-06	36.7126	134.781	36.7126	73.4252	6.19977e-05	8.67968e-05	3.71986e-05	7.48741e-05	8.9849e-05	5.98993e-05	0	0	0
111	Pantodonta	Archaeolambda	micron	Early Paleocene	A	M_3	V5784_Rm3.ply	296.146	296.146	296.146	209.969	86.1774	23.5729	12.9428	68.8822	68.8822	68.8822	130.25	130.25	130.25	141	124	138	118	120	125	138	138	0.5443	0.5443	0.5443	36.8253	12.3981	0.077	1.66e-06	2.05e-06	36.5157	133.34	36.5157	73.0314	7.97646e-05	7.97646e-05	7.97646e-05	9.85044e-05	9.85044e-05	9.85044e-05	0	0	0
112	Tillodontia	Dysnoetodon	minuta	Early Paleocene	A	M2_	V5838_LM2.ply	717.236	717.236	717.236	430.71	286.526	21.9965	14.2376	59.5055	59.5055	59.5055	294.12	294.12	294.12	308	316	315	311	272	272	277	282	NA	NA	NA	NA	NA	NA	1.03e-06	2.32e-06	36.234	131.29	36.234	72.468	5.0032e-05	5.0032e-05	5.0032e-05	0.000112693	0.000112693	0.000112693	0	0	0
54	Arctostylopida	Bothriostylops	progressus	Late Paleocene	C	M_3	V12665.2_Rm3.ply	301.971	301.971	301.971	190.448	111.524	27.4007	8.52308	72.0896	72.0896	72.0896	94.88	94.88	94.88	85	96	107	103	99	90	89	90	0.8052	0.8052	0.8052	35.8982	7.17273	0.014	1.41e-06	1.68e-06	35.9238	129.052	35.9238	71.8476	6.93198e-05	6.93198e-05	6.93198e-05	8.25938e-05	8.25938e-05	8.25938e-05	0	0	0
109	Pantodonta	Archaeolambda	micron	Early Paleocene	A	M_3	V5784_Lm3.ply	603.841	603.841	603.841	417.221	186.62	22.3217	12.9651	76.0468	76.0468	76.0468	205.75	205.75	205.75	199	216	196	208	203	209	213	202	0.482485	0.482485	0.482485	35.2869	13.4441	0.075	2.21e-06	3.68e-06	35.2869	124.517	35.2869	70.5738	0.000111406	0.000111406	0.000111406	0.000185508	0.000185508	0.000185508	0	0	0
79	Arctostylopida	Bothriostylops	progressus	Late Paleocene	C	M_2	V4264.1_Rm2.ply	399.359	399.359	399.359	286.101	113.258	25.3526	9.70887	72.5487	72.5487	72.5487	143.62	143.62	143.62	146	141	146	151	153	144	128	140	0.5608	0.5608	0.5608	35.0274	11.4096	0.009	1.25e-06	1.91e-06	35.0615	122.931	35.0615	70.123	6.358e-05	6.358e-05	6.358e-05	9.71503e-05	9.71503e-05	9.71503e-05	0	0	0
107	Pantodonta	Altilambda	minor	Middle Paleocene	B	M_1	V5302_Rm1.ply	401.821	401.821	401.821	259.022	142.799	23.0237	11.8503	64.0262	64.0262	64.0262	141.5	141.5	141.5	153	139	135	129	146	146	139	145	0.418638	0.418638	0.418638	34.8741	15.0966	0.006	1.76e-06	1.72e-06	34.8741	121.62	34.8741	69.7482	9.01949e-05	9.01949e-05	9.01949e-05	8.8145e-05	8.8145e-05	8.8145e-05	0	0	0
108	Pantodonta	Archaeolambda	micron	Early Paleocene	A	M_2	V5784_Lm2.ply	401.464	401.464	401.464	291.764	109.7	22.5305	12.255	69.141	69.141	69.141	147.88	147.88	147.88	132	150	148	156	152	151	154	140	0.4099	0.4099	0.4099	35.0263	15.4285	0.063	1.61e-06	3.33e-06	34.7855	121.003	34.7855	69.571	8.28022e-05	8.28022e-05	8.28022e-05	0.000171262	0.000171262	0.000171262	0	0	0
179	Anagalida	Hsiuannania	tabiensis	Late Paleocene	C	P4_	UCMP124733_RP4_.ply	204.294	286.012	122.577	134.089	70.2053	23.3386	10.1508	62.438	65.5599	59.3161	87.5	115.5	59.5	83	82	99	90	79	82	93	92	0.41344	0.545741	0.281139	33.4894	14.6488	0.006	1.51e-06	3.04e-06	33.4894	112.154	33.4894	66.9788	8.18993e-05	0.000114659	4.91396e-05	0.000164883	0.00019786	0.000131907	0	0	0
110	Pantodonta	Archaeolambda	micron	Early Paleocene	A	M_2	V5784_Rm2.ply	297.455	297.455	297.455	196.551	100.904	20.2552	13.1441	67.8718	67.8718	67.8718	119.12	119.12	119.12	118	135	120	124	117	114	115	110	0.5564	0.5564	0.5564	33.7124	11.0781	0.063	1.43e-06	3.03e-06	33.3994	111.552	33.3994	66.7988	7.7853e-05	7.7853e-05	7.7853e-05	0.000164961	0.000164961	0.000164961	0	0	0
211	Anagalida	Stenanagale	xiangensis	Early Paleocene	A	M_2	UCMP124792_LM_2.ply	343.008	480.212	205.805	224.638	118.371	21.9494	11.3421	75.8148	79.6056	72.0241	117.88	155.602	80.1584	113	125	128	104	109	113	125	126	0.64088	0.845962	0.435798	33.2915	9.24003	0.006	2.27e-06	3.9e-06	33.2915	110.832	33.2915	66.583	0.000124146	0.000173804	7.44876e-05	0.00021329	0.000255948	0.000170632	0	0	0
145	Anagalida	Huaiyangale	chianshanensis	Early Paleocene	A	M_3	V4269_Lm3.ply	401.417	561.983	240.85	157.723	243.694	23.1108	10.002	62.574	65.7027	59.4453	183.88	242.722	125.038	189	182	182	179	188	194	179	178	0.441649	0.582976	0.300321	33.1128	13.6894	0.043	1.92e-06	1.86e-06	33.1128	109.646	33.1128	66.2256	0.000105799	0.000148118	6.34792e-05	0.000102492	0.000122991	8.1994e-05	0	0	0
201	Anagalida	Anictops	tabienpedis	Late Paleocene	C	M3_	UCMP124761_LM3_.ply	321.16	449.624	192.696	197.091	124.069	18.3238	14.3673	62.6926	65.8272	59.558	133.25	175.89	90.61	125	140	168	147	122	126	120	118	0.41849	0.552407	0.284573	32.6911	14.1558	0.023	9.57e-07	2.34e-06	32.6911	106.871	32.6911	65.3822	5.36888e-05	7.51644e-05	3.22133e-05	0.000131277	0.000157532	0.000105021	0	0	0
184	Anagalida	Hsiuannania	sp	Late Paleocene	C	P_3	UCMP124735_LP_3.ply	212.352	297.293	127.411	151.272	61.0801	23.0574	9.20668	73.7513	77.4389	70.0638	105.5	139.26	71.74	111	109	115	94	104	104	95	112	0.52416	0.691891	0.356429	32.264	11.3093	0.003	1.79e-06	3.87e-06	32.264	104.097	32.264	64.528	0.000102287	0.000143202	6.13723e-05	0.000221146	0.000265375	0.000176917	0	0	0
238	Tillodontia	Interogale	datangensis	Early Paleocene	A	M_3	UCMP218939_RM_3.ply	384.249	537.949	230.55	255.804	128.445	23.2005	8.90453	73.1971	76.857	69.5373	191.38	252.622	130.138	188	189	186	193	200	193	194	188	0.54787	0.723188	0.372552	32.1051	10.7325	0.004	1.77e-06	2.13e-06	32.1051	103.074	32.1051	64.2102	0.000101846	0.000142584	6.11075e-05	0.00012256	0.000147072	9.80481e-05	0	0	0
174	Anagalida	Huaiyangale	chianshanensis	Late Paleocene	C	M_3	UCMP124731_RM_3.ply	221.897	310.656	133.138	143.651	78.2462	20.8515	10.8211	63.6265	66.8079	60.4452	124.62	164.498	84.7416	116	115	122	123	133	135	129	124	0.43674	0.576497	0.296983	31.6726	13.2232	0.003	2.11e-06	1.81e-06	31.6726	100.315	31.6726	63.3452	0.000123737	0.000173231	7.4242e-05	0.000106144	0.000127373	8.49151e-05	0	0	0
178	Anagalida	Hsiuannania	tabiensis	Late Paleocene	C	M3_	UCMP124733_RM3_.ply	314.662	440.527	188.797	189.762	124.901	33.9419	13.9354	66.0102	69.3107	62.7097	203.25	268.29	138.21	205	208	215	197	198	183	215	205	0.4894	0.646008	0.332792	47.8773	17.9906	0.011	1.63e-06	2.61e-06	31.6726	100.315	31.6726	63.3452	9.55881e-05	0.000133823	5.73528e-05	0.000153058	0.00018367	0.000122447	0	0	0
156	Anagalida	Anchilestes	impolitus	Early Paleocene	A	M_1	V4315_Lm1.ply	311.468	436.056	186.881	187.499	123.97	21.2328	10.2374	67.2665	70.6299	63.9032	81	106.92	55.08	79	83	81	87	80	75	82	81	0.436085	0.575632	0.296538	31.4702	13.1559	0.057	2.29e-06	1.91e-06	31.4702	99.0373	31.4702	62.9404	0.000135503	0.000189704	8.13019e-05	0.000113018	0.000135622	9.04144e-05	0	0	0
237	Tillodontia	Interogale	datangensis	Early Paleocene	A	M_2	UCMP218939_RM_2.ply	373.077	522.307	223.846	243.378	129.699	20.7113	10.718	69.7509	73.2385	66.2634	177.62	234.458	120.782	183	193	181	169	174	189	170	162	0.4912	0.648384	0.334016	31.4293	11.7675	0.008	1.55e-06	1.27e-06	31.4293	98.7801	31.4293	62.8586	9.18833e-05	0.000128637	5.513e-05	7.5285e-05	9.0342e-05	6.0228e-05	0	0	0
164	Pantodonta	Archaeolambda	tabiensis	Middle Paleocene	B	P_4	V4333_Rp4.ply	302.053	422.875	181.232	184.789	117.264	20.5994	10.4179	73.2954	76.9601	69.6306	87.25	115.17	59.33	83	87	92	85	81	89	88	93	0.60767	0.802125	0.413216	31.0173	9.20001	0.047	1.64e-06	3.05e-06	31.0173	96.2073	31.0173	62.0346	9.90311e-05	0.000138644	5.94187e-05	0.000184174	0.000221008	0.000147339	0	0	0
205	Anagalida	Paranictops	majuscula	Late Paleocene	C	M1_	UCMP124762_LM1_.ply	274.738	384.633	164.843	180.618	94.1201	19.445	11.5527	69.5474	73.0248	66.07	187.38	247.342	127.418	197	197	186	185	177	173	191	193	0.42994	0.567521	0.292359	30.9977	13.1187	0.005	2.86e-06	1.7e-06	30.9977	96.0857	30.9977	61.9954	0.000172853	0.000241995	0.000103712	0.000102745	0.000123294	8.21961e-05	0	0	0
73	Pantodonta	Yuodon	protoselenoides	Early Paleocene	A	M_1	V4236_Rm1.ply	312.277	313.277	314.277	178.501	133.776	20.5593	10.4344	70.3127	70.3127	70.3127	127.62	127.62	127.62	128	131	137	126	125	122	129	123	NA	NA	NA	NA	NA	NA	1.45e-06	1.61e-06	30.9937	96.0609	30.9937	61.9874	8.76513e-05	8.76513e-05	8.76513e-05	9.73232e-05	9.73232e-05	9.73232e-05	0	0	0
127	Pantodonta	Plethorodon	chienshanensis	Early Paleocene	A	P1_	V8304_RP1.ply	70.3417	70.3417	70.3417	63.9555	6.38623	22.485	8.01216	69.3881	69.3881	69.3881	14.88	14.88	14.88	16	12	14	16	16	13	14	18	0.5396	0.5396	0.5396	30.5515	10.3844	0.012	1.3e-06	1.89e-06	30.4972	93.0079	30.4972	60.9944	8.03809e-05	8.03809e-05	8.03809e-05	0.000116861	0.000116861	0.000116861	0	0	0
231	Tillodontia	Interogale	datangensis	Early Paleocene	A	M_2	UCMP218939_LM_2.ply	484.84	678.777	290.904	287.044	197.796	19.0225	11.3004	61.2875	64.3519	58.2231	254.5	335.94	173.06	260	255	252	254	247	253	259	256	0.39783	0.525136	0.270524	30.3229	13.6843	0.006	1.44e-06	1.72e-06	30.3229	91.9478	30.3229	60.6458	8.97546e-05	0.000125656	5.38528e-05	0.000107207	0.000128648	8.57655e-05	0	0	0
232	Tillodontia	Interogale	datangensis	Early Paleocene	A	M_3	UCMP218939_LM_3.ply	516.998	723.797	310.199	316.495	200.502	20.5472	9.67943	66.2183	69.5292	62.9074	220.88	291.562	150.198	229	230	217	213	224	227	216	211	0.45133	0.595756	0.306904	30.2266	12.2565	0.005	1.8e-06	1.2e-06	30.2266	91.3647	30.2266	60.4532	0.000112694	0.000157772	6.76164e-05	7.51293e-05	9.01552e-05	6.01035e-05	0	0	0
236	Tillodontia	Interogale	datangensis	Early Paleocene	A	M_1	UCMP218939_RM_1.ply	530.486	742.68	318.291	326.149	204.336	18.6787	10.6661	70.8435	74.3856	67.3013	204.75	270.27	139.23	187	194	204	210	216	228	204	195	0.51548	0.680434	0.350526	29.3448	10.4663	0.005	1.36e-06	1.22e-06	29.3448	86.1117	29.3448	58.6896	8.87501e-05	0.00012425	5.325e-05	7.9614e-05	9.55368e-05	6.36912e-05	0	0	0
142	Anagalida	Huaiyangale	chianshanensis	Early Paleocene	A	M1_	V4269_LM1_.ply	194.862	272.807	116.917	116.399	78.4631	17.8527	11.2742	49.6054	52.0856	47.1251	109.62	144.698	74.5416	108	120	106	108	117	114	104	100	0.238396	0.314683	0.162109	29.1269	18.0811	0.015	1.77e-06	4.01e-06	29.1269	84.8376	29.1269	58.2538	0.000116717	0.000163404	7.00303e-05	0.000264427	0.000317312	0.000211542	0	0	0
213	Anagalida	Stenanagale	xiangensis	Early Paleocene	A	P_4	UCMP124792_LP_4.ply	261.267	365.774	156.76	176.198	85.0683	19.9858	9.06277	79.8427	83.8348	75.8505	58.38	77.0616	39.6984	54	57	58	62	65	65	53	53	0.79927	1.05504	0.543504	29.0486	5.87332	0.005	1.34e-06	5.61e-06	29.0486	84.3821	29.0486	58.0972	8.86958e-05	0.000124174	5.32175e-05	0.000371331	0.000445597	0.000297065	0	0	0
210	Anagalida	Stenanagale	xiangensis	Early Paleocene	A	M_1	UCMP124792_LM_1.ply	566.233	792.726	339.74	392.895	173.339	19.0061	9.6971	77.5907	81.4702	73.7111	98.38	129.862	66.8984	87	90	89	93	114	114	106	94	0.67144	0.886301	0.456579	28.7032	7.49426	0.008	2.57e-06	7.1e-06	28.7032	82.3874	28.7032	57.4064	0.000172983	0.000242177	0.00010379	0.000477891	0.00057347	0.000382313	0	0	0
230	Tillodontia	Interogale	datangensis	Early Paleocene	A	M_1	UCMP218939_LM_1.ply	576.248	806.747	345.749	328.886	247.362	17.8154	9.88008	66.1649	69.4731	62.8566	261.25	344.85	177.65	267	261	263	243	254	256	274	272	0.44935	0.593142	0.305558	27.6955	11.2749	0.009	1.22e-06	2.3e-06	27.6955	76.7041	27.6955	55.391	8.63297e-05	0.000120862	5.17978e-05	0.000162753	0.000195303	0.000130202	0	0	0
144	Anagalida	Huaiyangale	chianshanensis	Early Paleocene	A	M2_	V4269_LM2_.ply	118.796	166.314	71.2776	82.2896	36.5064	17.4597	9.93639	50.0307	52.5323	47.5292	93.75	123.75	63.75	98	94	102	87	84	93	95	97	0.256289	0.338301	0.174277	27.3961	16.4089	0.014	1.13e-06	3.41e-06	27.3961	75.0546	27.3961	54.7922	8.11872e-05	0.000113662	4.87123e-05	0.000244999	0.000293998	0.000195999	0	0	0
149	Anagalida	Huaiyangale	chianshanensis	Early Paleocene	A	P4_	V4269_LP4_.ply	159.005	222.607	95.4029	95.2796	63.7251	17.7333	8.82373	54.1074	56.8128	51.402	106.38	140.422	72.3384	105	103	104	109	110	118	104	98	0.306365	0.404402	0.208328	26.5571	14.3905	0.014	8.79e-07	2.74e-06	26.5571	70.528	26.5571	53.1142	6.59643e-05	9.23501e-05	3.95786e-05	0.000205623	0.000246747	0.000164498	0	0	0
52	Arctostylopida	Bothriostylops	progressus	Late Paleocene	C	M_3	V12665.1_Lm3.ply	390.241	390.241	390.241	252.192	138.049	18.2421	7.99498	66.7657	66.7657	66.7657	129.38	129.38	129.38	139	118	126	127	125	134	130	136	0.7427	0.7427	0.7427	26.2249	5.93782	0.083	1.39e-06	2.78e-06	26.2371	68.8385	26.2371	52.4742	0.000106098	0.000106098	0.000106098	0.000212195	0.000212195	0.000212195	0	0	0
173	Anagalida	Huaiyangale	chianshanensis	Late Paleocene	C	M_2	UCMP124731_RM_2.ply	245.162	343.227	147.097	153.872	91.2899	16.7641	9.37606	60.7004	63.7354	57.6654	175	231	119	175	180	172	166	177	180	184	166	0.38331	0.505969	0.260651	26.1402	12.1442	0.003	2.02e-06	2.21e-06	26.1402	68.331	26.1402	52.2804	0.000154986	0.00021698	9.29915e-05	0.000169564	0.000203477	0.000135651	0	0	0
177	Anagalida	Hsiuannania	tabiensis	Late Paleocene	C	M2_	UCMP124733_RM2_.ply	355.41	497.575	213.246	209.768	145.642	26.4674	14.723	53.6055	56.2858	50.9252	204.38	269.782	138.978	219	211	209	198	186	193	196	223	0.29528	0.38977	0.20079	41.1904	22.8202	0.01	1.69e-06	3.07e-06	26.1402	68.331	26.1402	52.2804	0.000129666	0.000181533	7.77999e-05	0.000235548	0.000282657	0.000188438	0	0	0
120	Pantodonta	Plethorodon	chienshanensis	Early Paleocene	A	P1_	V8304_LP1.ply	51.4058	51.4058	51.4058	45.712	5.69385	19.5543	5.86218	62.6195	62.6195	62.6195	21.75	21.75	21.75	26	22	24	24	19	18	19	22	0.4928	0.4928	0.4928	25.4679	9.50558	0.008	9.8e-07	2.57e-06	25.4164	64.5993	25.4164	50.8328	7.82059e-05	7.82059e-05	7.82059e-05	0.000205091	0.000205091	0.000205091	0	0	0
82	Arctostylopida	Bothriostylops	progressus	Late Paleocene	C	M_3	V4264.5_Rm3.ply	1132.02	1132.02	1132.02	429.364	702.66	17.8951	6.54606	72.4817	72.4817	72.4817	151.62	151.62	151.62	155	149	141	150	159	149	153	157	0.6653	0.6653	0.6653	28.1648	7.44481	0.004	1.11e-06	1.34e-06	24.4411	59.7367	24.4411	48.8822	9.3568e-05	9.3568e-05	9.3568e-05	0.000112956	0.000112956	0.000112956	0	0	0
194	Arctostylopida	Sinostylops	promissus	Late Paleocene	C	M_3	UCMP124748_RM_3.ply	159.381	223.133	95.6286	124.135	35.2457	17.8163	6.23406	69.9804	73.4795	66.4814	37.25	49.17	25.33	42	42	34	28	33	41	39	39	0.54531	0.719809	0.370811	24.0503	8.08112	0.01	1.55e-06	7e-06	24.0503	57.8417	24.0503	48.1006	0.00013364	0.000187096	8.0184e-05	0.000603535	0.000724242	0.000482828	0	0	0
143	Anagalida	Huaiyangale	chianshanensis	Early Paleocene	A	M_2	V4269_Lm2.ply	187.864	263.009	112.718	108.861	79.0028	15.069	8.18378	59.3447	62.3119	56.3775	142.75	188.43	97.07	138	135	148	142	153	143	144	139	0.387949	0.512093	0.263806	23.2528	10.703	0.112	1.6e-06	4.71e-06	23.2528	54.0693	23.2528	46.5056	0.00014462	0.000202468	8.67719e-05	0.000425725	0.00051087	0.00034058	0	0	0
155	Anagalida	ANAptogale	wanghoensis	Early Paleocene	A	P3_	V4312_LP3_.ply	233.513	326.918	140.108	157.078	76.4347	15.2301	7.78927	62.2446	65.3568	59.1324	85.12	112.358	57.8816	76	79	80	82	83	92	97	92	0.388739	0.513136	0.264343	23.0194	10.5789	0.026	9.26e-07	2.33e-06	23.0194	52.9893	23.0194	46.0388	8.48893e-05	0.000118845	5.09336e-05	0.000213598	0.000256318	0.000170879	0	0	0
159	Anagalida	Anchilestes	impolitus	Early Paleocene	A	P_4	V4315_Lp4.ply	235.842	330.179	141.505	156.11	79.7324	14.9257	7.43886	73.6276	77.309	69.9463	74.25	98.01	50.49	70	81	72	65	74	74	82	76	0.621974	0.821006	0.422943	22.3645	6.44644	0.007	9.17e-07	1.5e-06	22.3645	50.0171	22.3645	44.729	8.75306e-05	0.000122543	5.25183e-05	0.00014318	0.000171816	0.000114544	0	0	0
235	Tillodontia	Interogale	datangensis	Early Paleocene	A	P_4	UCMP218939_LP_4.ply	227.691	318.768	136.615	157.823	69.8683	15.2927	6.86233	73.138	76.7949	69.4811	103.88	137.122	70.6384	114	98	106	98	90	98	111	116	0.60862	0.803378	0.413862	22.155	6.55886	0.005	1.27e-06	1.35e-06	22.155	49.0844	22.155	44.31	0.000122833	0.000171967	7.37001e-05	0.000130571	0.000156685	0.000104457	0	0	0
81	Arctostylopida	Bothriostylops	progressus	Late Paleocene	C	P_4	V4264.3_Rp4.ply	309.156	309.156	309.156	223.593	85.5628	15.155	6.35436	76.135	76.135	76.135	65.25	65.25	65.25	66	66	66	62	67	61	67	67	0.6404	0.6404	0.6404	21.4807	5.96823	0.002	1.55e-06	9.26e-07	21.5094	46.2654	21.5094	43.0188	0.000156252	0.000156252	0.000156252	9.33479e-05	9.33479e-05	9.33479e-05	0	0	0
163	Pantodonta	Archaeolambda	tabiensis	Middle Paleocene	B	P_3	V4333_Rp3.ply	243.93	341.501	146.358	151.167	92.7627	13.9291	6.45779	70.6075	74.1379	67.0771	59.62	78.6984	40.5416	65	57	55	61	57	59	61	62	0.560065	0.739286	0.380844	20.3869	6.65097	0.016	1.16e-06	2.45e-06	20.3869	41.5626	20.3869	40.7738	0.000126049	0.000176469	7.56294e-05	0.000266224	0.000319469	0.000212979	0	0	0
40	Arctostylopida	Wanostylops	youngi	Late Paleocene	C	M2_	V11357_LM2_.ply	209.85	209.85	209.85	140.749	69.1003	13.382	6.14364	55.7549	55.7549	55.7549	115.88	115.88	115.88	120	124	112	116	117	107	114	117	0.327	0.327	0.327	19.5257	10.1518	0.011	1.45e-06	2.74e-06	19.5257	38.1253	19.5257	39.0514	0.000167376	0.000167376	0.000167376	0.000316282	0.000316282	0.000316282	0	0	0
172	Anagalida	Huaiyangale	chianshanensis	Late Paleocene	C	M_1	UCMP124731_RM_1.ply	220.992	309.389	132.595	142.948	78.0442	11.5751	7.83239	62.446	65.5683	59.3237	127.38	168.142	86.6184	126	122	126	125	131	130	125	134	0.40128	0.52969	0.27287	19.4075	8.69803	0.002	1.99e-06	1.47e-06	19.4075	37.6651	19.4075	38.815	0.00023167	0.000324337	0.000139002	0.000171133	0.000205359	0.000136906	0	0	0
182	Anagalida	Hsiuannania	sp	Late Paleocene	C	P_1	UCMP124735_LP_1.ply	97.3433	136.281	58.406	78.8604	18.4829	14.4545	4.68583	78.9109	82.8564	74.9654	17.88	23.6016	12.1584	22	21	20	13	17	17	21	12	0.81334	1.07361	0.553071	19.1403	3.7626	0.003	1.29e-06	1.56e-05	19.1403	36.6351	19.1403	38.2806	0.000153121	0.000214369	9.18726e-05	0.0018517	0.00222204	0.00148136	0	0	0
57	Arctostylopida	Wanostylops	promissus	Late Paleocene	C	M2_	V12666_LM2_.ply	399.214	399.214	399.214	274.878	124.336	11.802	7.12122	60.1138	60.1138	60.1138	194.88	194.88	194.88	185	199	198	194	199	194	198	192	0.4922	0.4922	0.4922	18.92	7.06979	0.149	1.17e-06	2.39e-06	18.9233	35.8091	18.9233	37.8466	0.000141112	0.000141112	0.000141112	0.000288254	0.000288254	0.000288254	0	0	0
183	Anagalida	Hsiuannania	sp	Late Paleocene	C	P_2	UCMP124735_LP_2.ply	114.748	160.648	68.8489	92.8997	21.8486	14.3931	3.74784	75.8072	79.5976	72.0169	42.5	56.1	28.9	37	44	41	43	47	43	44	41	0.64524	0.851717	0.438763	18.141	4.99127	0.002	1.22e-06	1e-05	18.141	32.9096	18.141	36.282	0.000156102	0.000218542	9.3661e-05	0.00127952	0.00153543	0.00102362	0	0	0
78	Pantodonta	Yuodon	protoselenoides	Early Paleocene	A	P_4	V4236_Rp4.ply	250.513	250.513	250.513	178.29	72.2233	16.7767	8.16246	71.5597	71.5597	71.5597	61	61	61	53	60	59	69	69	60	59	59	NA	NA	NA	NA	NA	NA	1.15e-06	2.46e-06	18.0763	32.6753	18.0763	36.1526	0.000147883	0.000147883	0.000147883	0.000316341	0.000316341	0.000316341	0	0	0
226	Arctostylopida	Asiostylops	spenios	Middle Paleocene	B	M2_	UCMP124810_RM2_.ply	203.636	285.091	122.182	139.835	63.8009	11.0515	6.86605	56.1929	59.0025	53.3832	114	150.48	77.52	108	106	102	100	116	126	130	124	0.32445	0.428274	0.220626	17.9175	9.36405	0.005	1.3e-06	3.01e-06	17.9175	32.1037	17.9175	35.835	0.00016925	0.00023695	0.00010155	0.000391878	0.000470254	0.000313503	0	0	0
39	Arctostylopida	Wanostylops	youngi	Late Paleocene	C	M1_	V11357_LM1_.ply	280.795	280.795	280.795	173.865	106.93	12.0458	5.85322	60.4612	60.4612	60.4612	114.75	114.75	114.75	112	109	111	119	116	120	115	116	0.7245	0.7245	0.7245	17.9028	4.20348	0.044	1.14e-06	1.43e-06	17.899	32.0374	17.899	35.798	0.000148634	0.000148634	0.000148634	0.000186444	0.000186444	0.000186444	0	0	0
77	Pantodonta	Yuodon	protoselenoides	Early Paleocene	A	P_3	V4236_Rp3.ply	163.981	163.981	163.981	126.331	37.6501	11.7165	5.2647	73.4359	73.4359	73.4359	58.62	58.62	58.62	64	53	54	58	65	58	58	59	NA	NA	NA	NA	NA	NA	1.44e-06	2.56e-06	16.9762	28.8191	16.9762	33.9524	0.00020219	0.00020219	0.00020219	0.000359448	0.000359448	0.000359448	0	0	0
53	Arctostylopida	Bothriostylops	progressus	Late Paleocene	C	P_4	V12665.1_Lp4.ply	160.172	160.172	160.172	129.281	30.8913	12.0915	4.87747	70.2302	70.2302	70.2302	44	44	44	44	47	44	43	41	50	42	41	0.8328	0.8328	0.8328	16.9726	3.20887	0.03	1.34e-06	1.37e-06	16.969	28.7947	16.969	33.938	0.000188261	0.000188261	0.000188261	0.000192475	0.000192475	0.000192475	0	0	0
176	Anagalida	Huaiyangale	chianshanensis	Late Paleocene	C	P_4	UCMP124731_RP_4.ply	150.32	210.448	90.1919	94.9285	55.3914	10.8261	5.60607	68.3863	71.8057	64.967	77	101.64	52.36	81	89	78	66	67	68	84	83	0.52383	0.691456	0.356204	16.4321	5.76365	0.004	1.11e-06	1.04e-06	16.4321	27.0014	16.4321	32.8642	0.000163127	0.000228378	9.78762e-05	0.00015284	0.000183408	0.000122272	0	0	0
221	Arctostylopida	Asiostylops	spenios	Middle Paleocene	B	M3_	UCMP124810_LM3_.ply	198.177	277.448	118.906	136.016	62.1613	10.0732	5.7244	59.3086	62.274	56.3431	84.25	111.21	57.29	76	96	98	80	81	87	80	76	0.37078	0.48943	0.25213	15.7976	7.52552	0.009	1.14e-06	2.13e-06	15.7976	24.9564	15.7976	31.5952	0.000177032	0.000247844	0.000106219	0.000330769	0.000396923	0.000264616	0	0	0
212	Anagalida	Stenanagale	xiangensis	Early Paleocene	A	P_3	UCMP124792_LP_3.ply	156.378	218.929	93.8267	113.718	42.6598	10.9943	4.77003	78.3876	82.307	74.4683	32	42.24	21.76	38	34	31	25	31	31	30	36	0.81658	1.07789	0.555274	15.7643	3.07892	0.004	7.32e-07	1.04e-05	15.7643	24.8513	15.7643	31.5286	0.000114009	0.000159613	6.84055e-05	0.0016198	0.00194376	0.00129584	0	0	0
151	Anagalida	Chianshania	gianghuaensis	Early Paleocene	A	M2_	V4272_RM2_.ply	133.628	187.079	80.1768	96.9319	36.6961	9.6678	5.5525	56.6756	59.5093	53.8418	47	62.04	31.96	49	43	41	44	55	45	52	47	0.324562	0.428421	0.220702	15.2203	7.95267	0.006	1e-06	1.8e-06	15.2203	23.1658	15.2203	30.4406	0.000163599	0.000229039	9.81594e-05	0.000294478	0.000353374	0.000235583	0	0	0
150	Anagalida	Chianshania	gianghuaensis	Early Paleocene	A	M1_	V4272_RM1_.ply	184.219	257.906	110.531	124.951	59.2673	9.11609	5.98816	59.8957	62.8905	56.9009	60.38	79.7016	41.0584	58	64	58	62	61	67	56	57	0.371659	0.49059	0.252728	15.1043	7.18258	0.005	8.33e-07	2.45e-06	15.1043	22.814	15.1043	30.2086	0.000137746	0.000192844	8.26473e-05	0.000405134	0.000486161	0.000324107	0	0	0
227	Arctostylopida	Asiostylops	spenios	Middle Paleocene	B	M3_	UCMP124810_RM3_.ply	218.649	306.109	131.189	140.662	77.9867	9.35552	5.53122	57.7131	60.5988	54.8275	112.38	148.342	76.4184	111	114	109	116	124	111	101	113	0.35307	0.466052	0.240088	14.8867	7.34727	0.006	1.42e-06	2.05e-06	14.8867	22.1614	14.8867	29.7734	0.000239631	0.000335484	0.000143779	0.000345947	0.000415136	0.000276757	0	0	0
170	Anagalida	Diacronus	anhuiensis	Late Paleocene	C	M2_	UCMP124716_RM2_.ply	217.083	303.917	130.25	121.153	95.9308	9.3679	5.38036	58.5859	61.5152	55.6566	85.75	113.19	58.31	94	90	89	86	81	84	85	77	0.36473	0.481444	0.248016	14.7483	7.11118	0.009	9e-07	2.28e-06	14.7483	21.7512	14.7483	29.4966	0.000153878	0.000215429	9.23269e-05	0.000389825	0.00046779	0.00031186	0	0	0
59	Arctostylopida	Bothriostylops	medius	Middle Paleocene	B	M1_	V13504_palate2_LM1_.ply	169.851	169.851	169.851	138.902	30.9488	9.91486	4.71274	54.831	54.831	54.831	84.12	84.12	84.12	75	83	84	87	88	86	85	85	0.3767	0.3767	0.3767	14.6618	6.90257	0.018	9.38e-07	1.77e-06	14.6276	21.3967	14.6276	29.2552	0.000162231	0.000162231	0.000162231	0.000306129	0.000306129	0.000306129	0	0	0
225	Arctostylopida	Asiostylops	spenios	Middle Paleocene	B	M1_	UCMP124810_RM1_.ply	221.286	309.801	132.772	141.163	80.1234	8.09159	5.88124	54.878	57.6219	52.1341	125.62	165.818	85.4216	119	125	132	124	117	119	135	134	0.30638	0.404422	0.208338	13.9728	7.57129	0.023	9.19e-07	2.73e-06	13.9728	19.5239	13.9728	27.9456	0.00016947	0.000237258	0.000101682	0.00050343	0.000604116	0.000402744	0	0	0
192	Arctostylopida	Sinostylops	promissus	Late Paleocene	C	M_1	UCMP124748_RM_1.ply	126.575	177.204	75.9447	101.288	25.2866	8.88079	4.83821	75.2813	79.0453	71.5172	46	60.72	31.28	49	49	47	40	38	46	51	48	0.64157	0.846872	0.436268	13.719	3.80245	0.032	8.72e-07	1.76e-06	13.719	18.8211	13.719	27.438	0.000164983	0.000230976	9.89896e-05	0.000332993	0.000399591	0.000266394	0	0	0
219	Arctostylopida	Asiostylops	spenios	Middle Paleocene	B	M_2	UCMP124810_LM_2.ply	163.78	229.291	98.2678	108.169	55.6109	8.94378	4.77326	68.9099	72.3554	65.4644	76.62	101.138	52.1016	87	79	71	75	70	72	83	76	0.4646	0.613272	0.315928	13.717	5.41645	0.033	1.08e-06	1.37e-06	13.717	18.8156	13.717	27.434	0.000204378	0.000286129	0.000122627	0.000259257	0.000311109	0.000207406	0	0	0
169	Anagalida	Diacronus	anhuiensis	Late Paleocene	C	M1_	UCMP124716_RM1_.ply	131.815	184.542	79.0893	85.4973	46.3182	8.2256	5.49613	53.9979	56.6978	51.298	70.75	93.39	48.11	62	69	69	78	79	69	66	74	0.28204	0.372293	0.191787	13.7217	7.806	0.008	1.02e-06	1.65e-06	13.7	18.769	13.7	27.4	0.000193359	0.000270703	0.000116015	0.000312787	0.000375344	0.000250229	0	0	0
80	Arctostylopida	Bothriostylops	progressus	Late Paleocene	C	P_3	V4264.3_Rp3.ply	219.276	219.276	219.276	173.492	45.7842	9.32586	4.18365	74.5091	74.5091	74.5091	48.62	48.62	48.62	49	51	45	49	48	46	53	48	0.5883	0.5883	0.5883	13.5368	4.17396	0.003	8.21e-07	1.21e-06	13.5095	18.2507	13.5095	27.019	0.000158716	0.000158716	0.000158716	0.000233918	0.000233918	0.000233918	0	0	0
60	Arctostylopida	Bothriostylops	medius	Middle Paleocene	B	M2_	V13504_palate2_LM2_.ply	200.055	200.055	200.055	153.507	46.5478	9.74621	3.50619	52.9355	52.9355	52.9355	74.12	74.12	74.12	69	69	74	82	80	79	76	64	0.4374	0.4374	0.4374	13.2887	5.54095	0.014	1.09e-06	2.1e-06	13.2524	17.5626	13.2524	26.5048	0.000216465	0.000216465	0.000216465	0.000417042	0.000417042	0.000417042	0	0	0
55	Arctostylopida	Wanostylops	promissus	Late Paleocene	C	M_1	V12666.1_Lm1.ply	274.173	274.173	274.173	198.765	75.4077	8.86482	4.00643	71.808	71.808	71.808	91.12	91.12	91.12	98	99	89	89	79	84	91	100	0.5037	0.5037	0.5037	12.8736	4.70101	0.158	7.7e-07	2.57e-06	12.8712	16.5668	12.8712	25.7424	0.000159293	0.000159293	0.000159293	0.000531667	0.000531667	0.000531667	0	0	0
141	Anagalida	Huaiyangale	chianshanensis	Early Paleocene	A	M_1	V4269_Lm1.ply	98.2724	137.581	58.9635	82.2392	16.0332	8.87121	3.77603	51.9667	54.5651	49.3684	93.75	123.75	63.75	101	88	94	96	94	93	91	93	0.271411	0.358262	0.184559	12.6472	7.34939	0.093	7.07e-07	1.7e-06	12.6472	15.9952	12.6472	25.2944	0.0001499	0.000209859	8.99398e-05	0.000360438	0.000432525	0.00028835	0	0	0
49	Arctostylopida	Bothriostylops	progressus	Late Paleocene	C	P_2	V12039L_Lp2.ply	201.153	201.153	201.153	179.67	21.4827	9.07225	3.29965	77.0634	77.0634	77.0634	54.25	54.25	54.25	47	46	52	52	64	58	55	60	0.4488	0.4488	0.4488	12.3958	5.05153	0.011	6.56e-07	8.82e-07	12.3719	15.3064	12.3719	24.7438	0.000143439	0.000143439	0.000143439	0.000192855	0.000192855	0.000192855	0	0	0
56	Arctostylopida	Wanostylops	promissus	Late Paleocene	C	M1_	V12666_LM1_.ply	284.117	284.117	284.117	206.423	77.6934	7.69587	4.4367	57.6587	57.6587	57.6587	110.12	110.12	110.12	110	107	107	106	113	114	109	115	0.6217	0.6217	0.6217	12.1353	3.49989	0.008	9.16e-07	1.95e-06	12.1326	14.72	12.1326	24.2652	0.000205842	0.000205842	0.000205842	0.0004382	0.0004382	0.0004382	0	0	0
234	Tillodontia	Interogale	datangensis	Early Paleocene	A	P_3	UCMP218939_LP_3.ply	114.017	159.624	68.4105	92.2714	21.746	9.04381	2.85523	75.1175	78.8733	71.3616	28.62	37.7784	19.4616	23	25	34	29	27	28	29	34	0.64574	0.852377	0.439103	11.899	3.27062	0.004	6.17e-07	3.93e-06	11.899	14.1586	11.899	23.798	0.000142477	0.000199467	8.5486e-05	0.00090751	0.00108901	0.000726008	0	0	0
220	Arctostylopida	Asiostylops	spenios	Middle Paleocene	B	M_3	UCMP124810_LM_3.ply	158.674	222.143	95.2043	110.963	47.7112	7.78403	4.01325	64.332	67.5486	61.1154	95.12	125.558	64.6816	94	102	103	92	94	92	91	93	0.42529	0.561383	0.289197	11.7973	5.03943	0.011	6.35e-07	1.45e-06	11.7973	13.9176	11.7973	23.5946	0.000148406	0.000207768	8.90436e-05	0.00033888	0.000406656	0.000271104	0	0	0
146	Anagalida	Huaiyangale	chianshanensis	Early Paleocene	A	M3_	V4269_LM3_.ply	131.799	184.519	79.0795	85.6936	46.1055	7.44095	4.35554	51.5714	54.15	48.9928	71.88	94.8816	48.8784	75	64	71	72	72	74	73	74	0.270234	0.356708	0.183759	11.7965	6.87117	0.007	6.25e-07	1.97e-06	11.7965	13.9157	11.7965	23.593	0.000146083	0.000204516	8.76496e-05	0.000460453	0.000552543	0.000368362	0	0	0
175	Anagalida	Huaiyangale	chianshanensis	Late Paleocene	C	P_3	UCMP124731_RP_3.ply	128.704	180.186	77.2226	95.6143	33.0901	8.09374	3.40771	72.1265	75.7328	68.5202	42.25	55.77	28.73	35	40	35	47	47	46	46	42	0.43674	0.576497	0.296983	31.6726	13.2232	0.003	8.36e-07	1.65e-06	11.5014	13.2282	11.5014	23.0028	0.000202455	0.000283437	0.000121473	0.000399582	0.000479499	0.000319666	0	0	0
76	Pantodonta	Yuodon	protoselenoides	Early Paleocene	A	P_2	V4236_Rp2.ply	115.259	115.259	115.259	89.2765	25.9825	7.53414	3.34111	68.2562	68.2562	68.2562	35.5	35.5	35.5	38	31	32	31	33	37	41	41	NA	NA	NA	NA	NA	NA	8.89e-07	2.02e-06	10.8752	11.827	10.8752	21.7504	0.000232843	0.000232843	0.000232843	0.000529069	0.000529069	0.000529069	0	0	0
218	Arctostylopida	Asiostylops	spenios	Middle Paleocene	B	M_1	UCMP124810_LM_1.ply	146.495	205.093	87.8972	97.7164	48.7789	6.91973	3.48397	67.473	70.8466	64.0993	56.88	75.0816	38.6784	67	61	58	58	53	45	51	62	0.49346	0.651367	0.335553	10.4037	3.87767	0.004	6.15e-07	8.76e-07	10.4037	10.8237	10.4037	20.8074	0.00017139	0.000239946	0.000102834	0.000244126	0.000292951	0.000195301	0	0	0
115	Arctostylopida	Bothriostylops	notios	Middle Paleocene	B	M_3	V7642_Lm3.ply	326.475	326.475	326.475	242.99	83.4848	7.32608	3.0062	73.9761	73.9761	73.9761	88.75	88.75	88.75	101	93	84	78	88	82	88	96	0.568503	0.568503	0.568503	10.3323	3.31437	0.023	8.66e-07	4.77e-06	10.3323	10.6756	10.3323	20.6646	0.000243677	0.000243677	0.000243677	0.0013422	0.0013422	0.0013422	0	0	0
171	Anagalida	Diacronus	anhuiensis	Late Paleocene	C	P4_	UCMP124716_RP4_.ply	99.2245	138.914	59.5347	69.2151	30.0094	6.53356	3.68852	58.6619	61.595	55.7288	45.38	59.9016	30.8584	39	38	51	50	48	49	47	41	0.33913	0.447652	0.230608	10.2221	5.18768	0.023	1.05e-06	1.55e-06	10.2221	10.4491	10.2221	20.4442	0.000299921	0.000419889	0.000179952	0.00044274	0.000531288	0.000354192	0	0	0
229	Arctostylopida	Asiostylops	spenios	Middle Paleocene	B	P4_	UCMP124810_RP4_.ply	138.052	193.273	82.8311	98.6731	39.3787	6.14227	3.80056	61.7318	64.8184	58.6452	67.38	88.9416	45.8184	65	62	62	64	67	77	68	74	0.40524	0.534917	0.275563	9.94283	4.42102	0.019	8.13e-07	2.07e-06	9.94283	9.88599	9.94283	19.8857	0.000241407	0.00033797	0.000144844	0.000614652	0.000737583	0.000491722	0	0	0
148	Anagalida	Huaiyangale	chianshanensis	Early Paleocene	A	P_4	V4269_Lp4.ply	86.9903	121.786	52.1942	69.9659	17.0244	6.72844	2.31784	69.113	72.5687	65.6574	21.62	28.5384	14.7016	24	22	21	19	19	24	24	20	0.523691	0.691272	0.35611	9.04629	3.17394	0.006	5.62e-07	1.09e-06	9.04629	8.18354	9.04629	18.0926	0.000190481	0.000266673	0.000114288	0.000369438	0.000443325	0.00029555	0	0	0
228	Arctostylopida	Asiostylops	spenios	Middle Paleocene	B	P3_	UCMP124810_RP3_.ply	154.179	215.85	92.5072	109.158	45.0212	5.90658	3.09307	66.064	69.3672	62.7608	58.88	77.7216	40.0384	59	48	56	59	62	69	60	58	0.44999	0.593987	0.305993	8.99965	3.65903	0.006	6.92e-07	2.59e-06	8.99965	8.09937	8.99965	17.9993	0.000236245	0.000330744	0.000141747	0.000884214	0.00106106	0.000707371	0	0	0
198	Arctostylopida	Sinostylops	promissus	Late Paleocene	C	P_4	UCMP124748_RP_4.ply	93.3662	130.713	56.0197	78.9381	14.4281	5.87781	3.07344	73.8447	77.537	70.1525	39.12	51.6384	26.6016	34	37	38	42	43	47	37	35	0.59005	0.778866	0.401234	8.95125	2.75028	0.005	6.12e-07	3.99e-06	8.95125	8.01249	8.95125	17.9025	0.000210517	0.000294724	0.00012631	0.00137249	0.00164699	0.00109799	0	0	0
153	Anagalida	Chianshania	gianghuaensis	Early Paleocene	A	P4_	V4272_RP4_.ply	84.5855	118.42	50.7513	63.7106	20.875	5.60789	3.30434	58.3651	61.2834	55.4469	30.88	40.7616	20.9984	30	30	24	27	32	35	37	32	0.339795	0.44853	0.231061	8.91222	4.51693	0.029	8.67e-07	1.74e-06	8.91222	7.94277	8.91222	17.8244	0.000300063	0.000420088	0.000180038	0.000602202	0.000722643	0.000481762	0	0	0
62	Arctostylopida	Bothriostylops	medius	Middle Paleocene	B	P4_	V13504_palate2_LP4_.ply	93.0984	93.0984	93.0984	79.0014	14.097	6.47129	2.39577	50.8922	50.8922	50.8922	43	43	43	42	41	44	44	44	43	46	40	0.3392	0.3392	0.3392	8.89126	4.51195	0.01	7.34e-07	2.32e-06	8.86706	7.86248	8.86706	17.7341	0.000255846	0.000255846	0.000255846	0.000808667	0.000808667	0.000808667	0	0	0
193	Arctostylopida	Sinostylops	promissus	Late Paleocene	C	M_2	UCMP124748_RM_2.ply	81.1125	113.557	48.6675	67.5783	13.5342	6.3305	2.47074	68.3859	71.8052	64.9666	35.62	47.0184	24.2216	39	36	34	41	35	33	33	34	0.48649	0.642167	0.330813	8.80125	3.32647	0.019	6.46e-07	2.63e-06	8.80125	7.7462	8.80125	17.6025	0.000227533	0.000318546	0.00013652	0.000926333	0.0011116	0.000741066	0	0	0
58	Arctostylopida	Wanostylops	promissus	Late Paleocene	C	P4_	V12666_LP4_.ply	240.167	240.167	240.167	187.781	52.3864	5.41596	3.24242	60.7501	60.7501	60.7501	108	108	108	105	108	104	111	111	103	119	103	0.5401	0.5401	0.5401	8.66244	2.94086	0.01	7.65e-07	1.74e-06	8.65838	7.49675	8.65838	17.3168	0.000275692	0.000275692	0.000275692	0.000627063	0.000627063	0.000627063	0	0	0
233	Tillodontia	Interogale	datangensis	Early Paleocene	A	P_2	UCMP218939_LP_2.ply	121.61	170.254	72.966	103.855	17.7546	5.98631	1.75452	72.9373	76.5842	69.2905	28.75	37.95	19.55	26	28	25	28	27	34	31	31	0.55725	0.73557	0.37893	7.74082	2.5396	0.005	4.98e-07	1.67e-06	7.74082	5.99203	7.74082	15.4816	0.000209943	0.00029392	0.000125966	0.000704025	0.00084483	0.00056322	0	0	0
224	Arctostylopida	Asiostylops	spenios	Middle Paleocene	B	P_4	UCMP124810_LP_4.ply	91.355	127.897	54.813	67.7398	23.6152	5.15537	2.26493	70.347	73.8643	66.8296	51.12	67.4784	34.7616	54	59	52	49	47	49	48	51	0.51438	0.678982	0.349778	7.42029	2.65236	0.018	5.78e-07	7.6e-07	7.42029	5.50607	7.42029	14.8406	0.000258531	0.000361943	0.000155118	0.000339936	0.000407924	0.000271949	0	0	0
223	Arctostylopida	Asiostylops	spenios	Middle Paleocene	B	P_3	UCMP124810_LP_3.ply	72.1613	101.026	43.2968	57.8182	14.3431	5.13934	2.20946	71.2762	74.8401	67.7124	28.38	37.4616	19.2984	30	35	34	23	23	25	30	27	0.56209	0.741959	0.382221	7.3488	2.38776	0.008	4.62e-07	3.15e-06	7.3488	5.40049	7.3488	14.6976	0.000209465	0.000293252	0.000125679	0.00142817	0.00171381	0.00114254	0	0	0
114	Arctostylopida	Bothriostylops	notios	Middle Paleocene	B	M_2	V7642_Lm2.ply	341.401	341.401	341.401	210.615	130.786	5.14513	2.04293	70.4278	70.4278	70.4278	92.62	92.62	92.62	98	87	88	93	90	94	99	92	0.518125	0.518125	0.518125	7.18806	2.5502	0.063	8.92e-07	2.16e-06	7.18806	5.16682	7.18806	14.3761	0.00041714	0.00041714	0.00041714	0.00101011	0.00101011	0.00101011	0	0	0
196	Arctostylopida	Sinostylops	promissus	Late Paleocene	C	P_2	UCMP124748_RP_2.ply	56.603	79.2443	33.9618	45.4267	11.1763	4.39926	2.28985	67.2597	70.6227	63.8967	34.75	45.87	23.63	33	46	32	31	31	36	31	38	0.49377	0.651776	0.335764	6.68911	2.49162	0.009	5.07e-07	2.12e-06	6.68911	4.47442	6.68911	13.3782	0.00026222	0.000367108	0.000157332	0.00109646	0.00131575	0.000877169	0	0	0
197	Arctostylopida	Sinostylops	promissus	Late Paleocene	C	P_3	UCMP124748_RP_3.ply	67.2071	94.09	40.3243	51.5312	15.6759	4.31029	2.18404	70.9501	74.4976	67.4026	27	35.64	18.36	28	28	22	26	21	27	33	31	0.52997	0.69956	0.36038	6.49433	2.25013	0.013	8.69e-07	5.56e-06	6.49433	4.21763	6.49433	12.9887	0.00046843	0.000655802	0.000281058	0.00299709	0.00359651	0.00239767	0	0	0
147	Anagalida	Huaiyangale	chianshanensis	Early Paleocene	A	P_3	V4269_Lp3.ply	54.9086	76.872	32.9451	49.544	5.36452	5.25421	1.00123	70.0922	73.5968	66.5876	13.88	18.3216	9.4384	13	15	13	15	17	12	14	12	0.532756	0.703238	0.362274	6.25544	2.15532	0.004	3.96e-07	4.65e-07	6.25544	3.91305	6.25544	12.5109	0.000224961	0.000314946	0.000134977	0.000264159	0.000316991	0.000211327	0	0	0
113	Arctostylopida	Bothriostylops	notios	Middle Paleocene	B	M_1	V7642_Lm1.ply	236.186	236.186	236.186	170.264	65.9222	3.9908	1.85694	70.8402	70.8402	70.8402	54.12	54.12	54.12	52	56	65	55	50	54	53	48	0.524542	0.524542	0.524542	5.84774	2.04822	0.104	7.06e-07	1.83e-06	5.84774	3.41961	5.84774	11.6955	0.000440752	0.000440752	0.000440752	0.00114246	0.00114246	0.00114246	0	0	0
61	Arctostylopida	Bothriostylops	medius	Middle Paleocene	B	P3_	V13504_palate2_LP3_.ply	61.2153	61.2153	61.2153	55.0328	6.18248	4.51033	1.27547	58.2687	58.2687	58.2687	34.25	34.25	34.25	34	33	36	32	35	37	34	33	0.4194	0.4194	0.4194	5.79571	2.50514	0.009	5.36e-07	1.39e-06	5.7858	3.34755	5.7858	11.5716	0.000339648	0.000339648	0.000339648	0.000880804	0.000880804	0.000880804	0	0	0
152	Anagalida	Chianshania	gianghuaensis	Early Paleocene	A	P3_	V4272_RP3_.ply	56.5118	79.1165	33.9071	45.0473	11.4645	3.71987	1.75278	57.6139	60.4946	54.7332	35.5	46.86	24.14	33	39	41	35	33	29	35	39	0.355381	0.469102	0.241659	5.47265	2.68855	0.003	5.07e-07	1.21e-06	5.47265	2.99499	5.47265	10.9453	0.0003473	0.00048622	0.00020838	0.000828861	0.000994634	0.000663089	0	0	0
116	Arctostylopida	Bothriostylops	notios	Middle Paleocene	B	P_4	V7642_Lp4.ply	162.425	162.425	162.425	130.469	31.9557	2.99734	1.41878	68.1101	68.1101	68.1101	54.88	54.88	54.88	56	57	58	53	57	51	56	51	0.4167	0.4167	0.4167	4.42072	1.92117	0.069	3.63e-07	8.09e-07	4.41612	1.95021	4.41612	8.83224	0.000335755	0.000335755	0.000335755	0.000748281	0.000748281	0.000748281	0	0	0
195	Arctostylopida	Sinostylops	promissus	Late Paleocene	C	P_1	UCMP124748_RP_1.ply	44.0107	61.615	26.4064	35.0274	8.98337	3.10108	1.2614	65.8624	69.1555	62.5693	24.62	32.4984	16.7416	21	27	30	24	24	27	22	22	0.46208	0.609946	0.314214	4.36248	1.73131	0.004	3.73e-07	1.7e-06	4.36248	1.90312	4.36248	8.72496	0.000350958	0.000491341	0.000210575	0.00159954	0.00191945	0.00127963	0	0	0
222	Arctostylopida	Asiostylops	spenios	Middle Paleocene	B	P_1	UCMP124810_LP_1.ply	59.8139	83.7395	35.8883	45.3233	14.4906	2.07802	0.866513	72.5666	76.1949	68.9383	20.12	26.5584	13.6816	21	20	21	24	21	20	17	17	0.60133	0.793756	0.408904	2.94454	0.884524	0.004	2.63e-07	1.71e-06	2.94454	0.867032	2.94454	5.88908	0.000429047	0.000600665	0.000257428	0.00278962	0.00334754	0.0022317	0	0	0
[truncated: 4 more columns]

## Sheet: Sheet1
Specimen_order	Clade	Genus	Species	Age	Interval	Tooth	File	DNE	DNE+40p	DNE-40p	Convex_DNE	Concave_DNE	Convex_Area	Concave_Area	Slope	Slope+5p	Slope-5p	OPCR	OPCR+32p	OPCR-32p	0 deg.	5.625 deg.	11.25 deg.	16.875 deg.	22.5 deg.	28.125 deg.	33.75 deg.	39.375 deg.	RFI	RFI+13p	RFI-13p	3D_Area	2D_Area	Alpha	compress_se	shear_se	model_area	model_volume	compress_force	shear_force	adj_comp_se	adj_shear_se	DNE_sample	OPCR_sample	Slope_sample	RFI_sample	Weight
102	Pantodonta	Altilambda	pactus	Early Paleocene	A	M_1	V5228_Lm1.ply	405.819	405.819	405.819	281.77	124.049	130.102	89.7614	67.4319	67.4319	67.4319	178.5	178.5	178.5	193	180	164	173	176	178	186	178	0.295	0.295	0.295	220.499	122.223	0.161	7.62e-06	5.42e-06	219.863	4833.97	219.863	439.726	7.62e-06	5.42e-06	0	0	0	0	44
106	Pantodonta	Altilambda	tenuis	Early Paleocene	A	M_1	V5231_Lm1.ply	555.072	555.072	555.072	412.131	142.942	65.3808	34.7968	71.8379	71.8379	71.8379	212	212	212	204	205	203	216	215	230	213	210	0.578861	0.578861	0.578861	100.178	31.4759	0.002	3.72e-06	2.26e-06	100.178	1003.56	100.178	200.356	1.11808e-05	6.79266e-06	0	0	0	0	44	compress % difference	shear % difference
							V5228_Lm1_cast																												3.57088e-06	5.44303e-06	187.286	3507.6	187.286	374.572	4.46973e-06	6.81312e-06						0.413422	0.204477
							V5231_Lm1_cast																												3.00571e-06	2.63912e-06	95.4812	911.666	95.4812	190.962	9.66218e-06	8.48374e-06						0.135828	0.199331
