# Supplementary material for: Brawn before bite in endemic Asian eutherian mammals after the end-Cretaceous extinction
Source: eLife. 2026 Jun 30;14:RP108917. doi: 10.7554/eLife.108917 (PMC13318306; doi:10.7554/eLife.108917)
Supplement: Source data 7. [file elife-108917-data7.xlsx]

## Sheet: All-taxon_all-teeth_DTA&FEA_sta
	Time.partition	Trait	RawVariance	BootstrapVariance	F	FciLow	FciHigh	Fp	t	tciLow	tciHigh	tp	aov_trait_mean	aov_t	aov_ci_low	aov_ci_high	aov_p	aov_interpretation (A: E. Paleocene; B: M. Paleocene; C: L. Paleocene)
1	A	DNE	22858.5	5883.23	0	0	0	0	46.1126	5853.95	5912.52	1.16238e-249	0.249628	50.6762	#NAME?	0.256114	1
2	B	DNE	24372.1	11577.7	0.0710252	0.0627364	0.080409	5.0492e-305	25.4084	11467.9	11687.6	2.93127e-110	0.741639	123.772	#NAME?	0.750839	1
3	C	DNE	46322.5	15735.8	1.65178	1.45902	1.87001	3.10862e-15	28.9217	15650.3	15821.3	4.11442e-134	0.179331	39.6963	#NAME?	0.184695	1
4	A	Slope	61.7979	14.4843	0	0	0	0	24.5605	14.4492	14.5194	1.37308e-104	0.199162	66.3758	#NAME?	0.202861	1
5	B	Slope	53.9219	23.3744	0.200773	0.177343	0.227299	4.23903e-129	22.7193	23.296	23.4527	1.89579e-92	0.488852	121.719	#NAME?	0.494788	1
6	C	Slope	48.8333	15.9986	2.99858	2.64865	3.39476	0	32.0213	15.9533	16.0438	2.19509e-155	0.377765	90.6808	#NAME?	0.383715	1
7	A	OPCR	4074.27	980.383	0	0	0	0	27.9883	976.568	984.198	9.83022e-128	0.0826472	22.2277	#NAME?	0.0850653	1
8	B	OPCR	2552.78	1196.89	0.141799	0.125251	0.160533	9.61743e-183	25.807	1186.76	1207.02	6.11556e-113	0.17295	39.5709	#NAME?	0.178065	1
9	C	OPCR	6134.45	2065.57	1.29686	1.14551	1.4682	4.1091e-05	32.7693	2056.68	2074.47	1.59994e-160	0.0140865	-93.0241	#NAME?	0.0147221	0	B-C shift
10	A	RFI	0.0165464	0.00486716	0	0	0	0	61.3002	0.00483173	0.00490258	0	0.319597	41.1491	#NAME?	0.330384	1
11	B	RFI	0.0158541	0.00892236	0.175684	0.155182	0.198896	6.43189e-149	53.7853	0.00883785	0.00900688	2.92371e-297	0.572738	68.8777	#NAME?	0.585233	1
12	C	RFI	0.0151307	0.00637781	3.47712	3.07133	3.93652	0	71.414	0.00633248	0.00642313	0	0.460973	50.7057	#NAME?	0.474317	1
13	A	COMP	4.14875e-09	1.04249e-09	0	0	0	0	21.3364	1.03333e-09	1.05165e-09	1.58239e-83	0.000909512	-1291.98	#NAME?	0.000972068	0	Overall shift
14	B	COMP	1.37536e-08	6.10584e-09	0.0633168	0.0559276	0.0716822	0	20.2261	6.06944e-09	6.14224e-09	1.6248e-76	0.00207958	-1072.25	#NAME?	0.00215316	0	A-B shift
15	C	COMP	8.6647e-09	2.97545e-09	1.56187	1.3796	1.76823	2.28395e-12	18.0374	2.94632e-09	3.00457e-09	3.53406e-63	0.23412	58.3129	#NAME?	0.239319	1
16	A	SHEAR	5.53711e-08	1.28156e-08	0	0	0	0	4.84849	1.2722e-08	1.29092e-08	1.44194e-06	0.0122503	-314.012	#NAME?	0.0124482	0	Overall shift
17	B	SHEAR	2.72307e-07	1.15e-07	0.0105674	0.00933414	0.0119635	0	3.3178	1.1409e-07	1.15911e-07	0.000940024	0.0184294	-255.597	#NAME?	0.0186328	0	A-B shift
18	C	SHEAR	2.72725e-07	8.67393e-08	1.87806	1.65889	2.12619	0	4.46813	8.6075e-08	8.74037e-08	8.79187e-06	0.618135	211.684	#NAME?	0.622553	1

## Sheet: All-taxon_M2_DTA&FEA_statistics
	Time.partition	Trait	RawVariance	BootstrapVariance	F	FciLow	FciHigh	Fp	t	tciLow	tciHigh	tp	aov_p_mean	aov_t	aov_ci_high	aov_p	aov_interpretation (A: E. Paleocene; B: M. Paleocene; C: L. Paleocene)
1	A	DNE	33331.1	7724.35	0	0	0	0	9.72307	7694.26	7754.45	2.06346e-21	0.60383	102.636	0.612714	1
2	B	DNE	39251.5	16553	0.130444	0.115221	0.147679	1.59875e-196	4.66861	16469.7	16636.4	3.44583e-06	0.917664	479.853	0.920641	1
3	C	DNE	32613.5	12455.9	0.068453	0.0604645	0.0774971	5.5263419472791e-312	13.9513	12137.4	12774.4	1.50867e-40	0.502665	99.0336	0.510191	1
4	A	Slope	34.0188	7.89651	0	0	0	0	6.11346	7.84356	7.94946	1.39637e-09	0.457756	115.103	0.463589	1
5	B	Slope	36.8357	15.5761	2.74106	2.42117	3.1032	0	13.9827	15.5441	15.6081	1.04339e-40	0.905833	417.44	0.909208	1
6	C	Slope	27.3868	9.25119	0.0554532	0.0489818	0.0627797	0	10.0098	9.11537	9.38701	1.52678e-22	0.38066	123.107	0.385082	1
7	A	OPCR	4148.29	963.904	0	0	0	0	10.4754	959.949	967.858	1.96004e-24	0.120583	34.8763	0.123915	1
8	B	OPCR	1393.34	619	3.58603	3.16753	4.05981	0	36.1255	616.911	621.088	1.75083e-183	0.30926	93.4933	0.313825	1
9	C	OPCR	5312.26	1943.95	0.00868656	0.00767283	0.00983423	0	24.8621	1921.54	1966.35	1.3362e-106	0.0262926	-51.9648	0.0270437	1.49262e-286	B-C shift
10	A	RFI	0.0206886	0.00503344	0	0	0	0	18.7168	0.00499869	0.0050682	3.05074e-67	0.679838	149.998	0.686751	1
11	B	RFI	0.00411715	0.00210736	1.38384	1.22234	1.56667	3.03248e-07	26.0298	0.00207782	0.0021369	1.92708e-114	0.312394	59.5436	0.319649	1
12	C	RFI	0.00577713	0.00301226	0.164036	0.144893	0.185708	1.72157e-159	32.4684	0.00293932	0.00308521	1.86266e-158	0.350297	45.205	0.361233	1
13	A	COMP	2.22107e-09	5.4926e-10	0	0	0	0	6.12898	5.35022e-10	5.63499e-10	1.27121e-09	0.316662	68.6348	0.323058	1
14	B	COMP	9.83934e-09	4.25765e-09	0.113172	0.0999645	0.128124	1.13771e-220	7.32228	4.21533e-09	4.29998e-09	5.01121e-13	0.466768	164.805	0.470931	1
15	C	COMP	4.24915e-09	1.4167e-09	7.97267	7.04225	9.02601	0	11.6304	1.40171e-09	1.43169e-09	2.05784e-29	0.861359	247.139	0.866764	1
16	A	SHEAR	1.00235e-08	2.33222e-09	0	0	0	0	4.15107	2.30662e-09	2.35783e-09	3.59155e-05	0.35129	155.372	0.354483	1
17	B	SHEAR	4.4984e-08	1.89415e-08	0.0394041	0.0348056	0.0446102	0	3.015	1.88125e-08	1.90705e-08	0.0026347	0.453891	347.826	0.455803	1
18	C	SHEAR	2.2227e-08	7.10601e-09	5.40408	4.77342	6.11807	0	5.66158	7.05052e-09	7.16149e-09	1.95952e-08	0.928863	548.935	0.931498	1

## Sheet: Pantodont_all-teeth_DTA&FEA_sta
	Time.partition	Trait	RawVariance	BootstrapVariance	F	FciLow	FciHigh	Fp	t	tciLow	tciHigh	tp	aov_p_mean	aov_t	aov_ci_high	aov_p	aov_interpretation (A: E. Paleocene; B: M. Paleocene; C: L. Paleocene)
1	A	DNE	18215.8	4513.2	0	0	0	0	28.618	4487.61	4538.8	4.91434e-132	1.63671e-06	-328185	1.88754e-06	0	Overall shift
2	B	DNE	12415	5971.39	0.178532	0.157697	0.20212	1.77606e-146	25.8674	5910.82	6031.97	2.39703e-113	0.620626	89.761	0.631092	1
3	C	DNE	14284.8	6591.41	0.314309	0.277628	0.355835	5.79735e-71	38.6393	6483.36	6699.45	1.66281e-200	4.41347e-05	-20490.1	4.81486e-05	0	B-C shift
4	A	Slope	53.6975	12.3524	0	0	0	0	10.4428	12.3245	12.3803	2.67199e-24	0.680133	271.428	0.683956	1
5	B	Slope	41.0275	17.5226	0.0779097	0.0688176	0.0882032	9.97508e-288	8.4036	17.4227	17.6225	1.47568e-16	0.730391	197.635	0.736059	1
6	C	Slope	72.2261	22.881	5.34357	4.71996	6.04956	0	14.0897	22.8377	22.9242	2.95807e-41	0.623607	185.224	0.628705	1
7	A	OPCR	3318.24	775.227	0	0	0	0	26.9195	773.69	776.764	1.84035e-120	4.73462e-07	-1.51171e+06	5.27916e-07	0	Overall shift
8	B	OPCR	1116.77	521.286	0.0668128	0.0590157	0.0756402	1.40092936400999e-316	18.4715	515.341	527.231	9.12858e-66	0.0964347	25.0155	0.0994908	1
9	C	OPCR	3353.85	1225.23	0.532182	0.470076	0.602494	4.83281e-23	42.6558	1217.08	1233.38	3.12171e-227	2.92263e-06	-554929	3.07096e-06	0	B-C shift
10	A	RFI	0.0127591	0.00337192	0	0	0	0	39.7093	0.00334859	0.00339526	1.09194e-207	0.862067	220.29	0.868136	1
11	B	RFI	0.0187314	0.00926425	0.0433321	0.0382752	0.0490571	0	25.5531	0.00915217	0.00937633	3.12722e-111	0.762335	131.803	0.771233	1
12	C	RFI	0.0070685	0.00300948	5.1454	4.54492	5.8252	0	31.7943	0.00296007	0.0030589	7.95717e-154	0.70847	103.191	0.718976	1
13	A	COMP	2.00045e-09	4.66141e-10	0	0	0	0	21.3905	4.65087e-10	4.67196e-10	7.14099e-84	0.0299743	-153.134	0.0301896	0	Overall shift
14	B	COMP	1.62754e-09	7.16418e-10	0.0233872	0.0206579	0.0264771	0	10.8951	7.09524e-10	7.23313e-10	3.3838e-26	0.827921	223.501	0.833652	1
15	C	COMP	4.21439e-10	1.3271e-10	6826.48	6029.82	7728.39	0	23.763	1.32627e-10	1.32794e-10	2.68274e-99	0.00261632	-1763.2	0.00266056	0	B-C shift
16	A	SHEAR	8.75677e-09	1.99482e-09	0	0	0	0	14.4844	1.99419e-09	1.99545e-09	2.67662e-43	0.055516	46.8293	0.05571	1
17	B	SHEAR	4.27412e-09	1.83124e-09	0.00102421	0.000904684	0.00115953	0	5.02179	1.81156e-09	1.85092e-09	6.06059e-07	0.540031	158.903	0.545108	1
18	C	SHEAR	5.38919e-10	1.68733e-10	92651.5	81839	104893	0	9.73816	1.68668e-10	1.68798e-10	1.8021e-21	0.00439173	-997.986	0.00446697	0	B-C shift

## Sheet: Pantodont_premolars_DTA&FEA_sta
	Time.partition	Trait	RawVariance	BootstrapVariance	F	FciLow	FciHigh	Fp	t	tciLow	tciHigh	tp	aov_p_mean	aov_t	aov_ci_high	aov_p	aov_interpretation (A: E. Paleocene; B: M. Paleocene; C: L. Paleocene)
1	A	DNE	9643.05	2427.72	0	0	0	0	19.8929	2404.43	2451.01	1.9276e-74	6.92669e-05	-12114.6	7.60525e-05	0	Overall shift
2	B	DNE	893.148	857.966	0.521212	0.460386	0.590074	1.86337e-24	29.5499	825.704	890.229	2.04609e-138	0.220205	31.6174	0.229068	1
3	C	DNE	14752.8	5777.74	0.0282608	0.0249627	0.0319946	0	11.9377	5585.83	5969.66	8.37157e-31	0.00655888	-252.985	0.00684159	0	B-C shift
4	A	Slope	51.7273	11.916	0	0	0	0	5.73095	11.8613	11.9707	1.32157e-08	0.763724	293.099	0.767733	1
5	B	Slope	24.9671	10.8435	0.241488	0.213306	0.273394	1.78742e-103	7.76473	10.7322	10.9549	2.01987e-14	0.34228	124.685	0.346139	1
6	C	Slope	23.1875	7.46858	4.36416	3.85486	4.94076	0	8.19187	7.41529	7.52188	7.81345e-16	0.472386	128.232	0.477809	1
7	A	OPCR	810.306	196.745	0	0	0	0	17.9396	195.368	198.121	1.33997e-62	2.46729e-07	-3.74339e+06	2.6872e-07	0	Overall shift
8	B	OPCR	257.841	132.023	0.301583	0.266388	0.341428	1.01528e-75	19.2497	129.516	134.529	1.76489e-70	0.789935	161.336	0.797486	1
9	C	OPCR	2162.35	749.128	0.244288	0.215779	0.276563	5.99787e-102	28.398	744.056	754.199	1.56949e-130	0.00144232	-3153.28	0.00146767	0	B-C shift
10	A	RFI	0.0104458	0.0030711	0	0	0	0	24.3459	0.00301492	0.00312729	3.67851e-103	0.714552	114.709	0.724091	1
11	B	RFI	0.0195778	0.00958854	0.291075	0.257106	0.329532	6.61087e-80	26.9668	0.0094844	0.00969268	8.79201e-121	0.620212	88.5811	0.630811	1
12	C	RFI	0.00648638	0.00262544	2.953	2.60838	3.34315	0	19.3781	0.00256484	0.00268604	2.88659e-71	0.49899	64.0528	0.51053	1
13	A	COMP	3.54468e-09	8.21272e-10	0	0	0	0	19.4052	8.19688e-10	8.22856e-10	1.9706e-71	0.139822	178.488	0.140651	1
14	B	COMP	2.2821e-09	1.02629e-09	0.0165822	0.014647	0.018773	0	12.032	1.01399e-09	1.03859e-09	3.09533e-31	0.734721	148.953	0.742289	1
15	C	COMP	5.30467e-10	1.66726e-10	16716.2	14765.4	18924.7	0	19.6982	1.66631e-10	1.66821e-10	3.09289e-73	0.018356	-273.345	0.0185466	0	B-C shift
16	A	SHEAR	1.7359e-08	3.94824e-09	0	0	0	0	4.59767	3.94695e-09	3.94952e-09	4.81979e-06	0.225406	505.002	0.225977	1
17	B	SHEAR	7.77809e-09	3.28748e-09	0.000793983	0.000701324	0.000898884	0	2.00896	3.24195e-09	3.333e-09	0.0448095	0.562781	159.33	0.56808	1
18	C	SHEAR	1.10611e-09	3.46049e-10	404682	357455	458148	0	10.7061	3.45978e-10	3.46121e-10	2.13668e-25	0.0696593	65.8188	0.0701511	1

## Sheet: Pantodont_molars_DTA&FEA_statis
	Time.partition	Trait	RawVariance	BootstrapVariance	F	FciLow	FciHigh	Fp	t	tciLow	tciHigh	tp	aov_p_mean	aov_t	aov_ci_high	aov_p	aov_interpretation (A: E. Paleocene; B: M. Paleocene; C: L. Paleocene)
1	A	DNE	15991	4063.87	0	0	0	0	25.9335	4031.37	4096.38	8.59583e-114	0.00026695	-2174.87	0.000304598	0	Overall shift
2	B	DNE	15386.8	7511.88	0.205531	0.181545	0.232686	9.9245e-126	30.1266	7440.18	7583.57	2.26279e-142	0.768436	140.782	0.776838	1
3	C	DNE	6324.95	4682.28	0.259679	0.229374	0.293988	5.16116e-94	37.7383	4541.58	4822.97	1.99297e-194	0.000958038	-897.594	0.00104799	0	B-C shift
4	A	Slope	55.6333	12.7964	0	0	0	0	10.4434	12.7678	12.8251	2.65772e-24	0.615482	235.359	0.619438	1
5	B	Slope	46.2058	19.8328	0.030089	0.0265776	0.0340644	0	6.89417	19.6676	19.998	9.5906e-12	0.803144	212.849	0.80897	1
6	C	Slope	116.706	36.8863	3.80461	3.3606	4.30727	0	9.6285	36.8016	36.971	4.80563e-21	0.423087	167.033	0.426764	1
7	A	OPCR	2583.54	613.804	0	0	0	0	31.5933	612.15	615.458	1.91355e-152	3.72327e-05	-19750.1	4.13977e-05	0	Overall shift
8	B	OPCR	736.482	390.034	0.0740453	0.0654041	0.0838281	3.29311e-297	26.8426	383.954	396.114	6.1209e-120	0.0421856	-5.82502	0.0443942	3.84745e-09	A-B shift
9	C	OPCR	2583.21	1061.72	0.360294	0.318247	0.407896	3.2222e-56	49.2985	1051.59	1071.85	8.34808e-270	0.000255735	-5544.56	0.000270506	0	B-C shift
10	A	RFI	0.0137893	0.0034822	0	0	0	0	43.3944	0.00346646	0.00349795	4.51221e-232	0.700465	103.764	0.710786	1
11	B	RFI	0.0157148	0.00810196	0.00640926	0.00566129	0.00725605	0	15.502	0.00790523	0.00829868	9.89854e-49	0.544604	57.4208	0.558785	1
12	C	RFI	0.00940151	0.00390395	4.09934	3.62094	4.64095	0	19.5089	0.00380679	0.00400112	4.54131e-72	0.476612	49.3663	0.49084	1
13	A	COMP	8.6006e-10	2.02809e-10	0	0	0	0	11.7193	2.0158e-10	2.04038e-10	8.20089e-30	0.0889608	93.4991	0.0896469	1
14	B	COMP	5.88118e-10	2.63701e-10	0.34969	0.30888	0.395891	2.58553e-59	17.6088	2.61622e-10	2.65779e-10	1.18438e-60	0.673945	112.481	0.683077	1
15	C	COMP	3.90198e-10	1.22816e-10	343.442	303.362	388.818	0	15.3825	1.22704e-10	1.22928e-10	4.42092e-48	0.0427762	-18.9892	0.0434025	3.41743e-69	B-C shift
16	A	SHEAR	2.48964e-09	5.71783e-10	0	0	0	0	7.97505	5.70317e-10	5.73248e-10	4.14845e-15	0.05744	60.5913	0.0576422	1
17	B	SHEAR	1.44602e-09	6.21061e-10	0.0657817	0.0581049	0.0744728	1.5526506986207e-319	6.37146	6.15347e-10	6.26775e-10	2.85335e-10	0.611247	159.381	0.617045	1
18	C	SHEAR	8.35306e-11	2.63942e-11	2867.3	2532.69	3246.13	0	5.35016	2.62875e-11	2.65009e-11	1.08969e-07	0.00629826	-1212.68	0.00635759	0	B-C shift

## Sheet: NonPantodont_all-teeth_DTA&FEA_
	Time.partition	Trait	RawVariance	BootstrapVariance	F	FciLow	FciHigh	Fp	t	tciLow	tciHigh	tp	aov_p_mean	aov_t	aov_ci_high	aov_p	aov_interpretation (A: E. Paleocene; B: M. Paleocene; C: L. Paleocene)
1	A	DNE	30239.3	8048.97	0	0	0	0	33.8408	7980.76	8117.19	7.13782e-168	0.879479	248.246	0.88498	1
2	B	DNE	31436.2	15171	0.126792	0.111995	0.143543	2.7759e-201	21.2297	14979.4	15362.6	7.57629e-83	0.742959	121.872	0.75232	1
3	C	DNE	35743	12148.1	4.99035	4.40797	5.64968	0	22.388	12062.3	12233.9	2.70481e-90	0.74997	121.539	0.759452	1
4	A	Slope	75.3553	18.0012	0	0	0	0	21.9207	17.9229	18.0795	2.83862e-87	0.61242	134.328	0.619313	1
5	B	Slope	63.1646	27.3902	0.417253	0.368559	0.47238	4.05929e-42	17.342	27.2689	27.5115	4.25615e-59	0.754906	160.795	0.762124	1
6	C	Slope	43.2722	14.4225	4.27984	3.78038	4.8453	0	30.1275	14.3639	14.4811	2.23136e-142	0.612266	118.147	0.620101	1
7	A	OPCR	5305.29	1328.44	0	0	0	0	22.979	1317.96	1338.92	3.8235e-94	0.839884	228.835	0.845567	1
8	B	OPCR	3551.48	1662.48	0.368438	0.325441	0.417116	5.96114e-54	20.7693	1645.22	1679.74	6.29586e-80	0.676214	104.43	0.686086	1
9	C	OPCR	3927.37	1354.55	2.79074	2.46506	3.15946	0	24.1667	1344.22	1364.89	5.70613e-102	0.606765	87.4638	0.617246	1
10	A	RFI	0.0224866	0.00706291	0	0	0	0	46.9422	0.0069813	0.00714452	5.88425e-255	0.472984	52.7306	0.48619	1
11	B	RFI	0.0143249	0.00888984	0.465978	0.411598	0.527543	8.99496e-33	47.9448	0.00877028	0.00900939	2.60898e-261	0.585004	67.4079	0.598071	1
12	C	RFI	0.0166293	0.00711032	4.52103	3.99342	5.11835	0	66.785	0.0070541	0.00716655	0	0.5662	62.6913	0.579756	1
13	A	COMP	4.43834e-09	1.26623e-09	0	0	0	0	26.4492	1.24712e-09	1.28533e-09	2.82962e-117	0.0170751	-48.0425	0.0182034	3.15692e-262	Overall shift
14	B	COMP	1.32461e-08	6.15887e-09	0.165656	0.146324	0.187543	5.83952e-158	26.7402	6.11192e-09	6.20581e-09	3.0268e-119	0.00852524	-146.157	0.00899243	0	A-B shift
15	C	COMP	7.35732e-09	2.66913e-09	1.94857	1.72117	2.20602	0	21.5894	2.63551e-09	2.70276e-09	3.81613e-85	0.0514782	1.18116	0.0535386	0.881091
16	A	SHEAR	9.816e-08	2.29582e-08	0	0	0	0	5.91993	2.2743e-08	2.31734e-08	4.42388e-09	0.17553	93.8412	0.177732	1
17	B	SHEAR	3.52917e-07	1.47472e-07	0.0237035	0.0209373	0.0268352	0	0.594011	1.46074e-07	1.48869e-07	0.55264	0.056101	15.1493	0.056764	1
18	C	SHEAR	3.18111e-07	1.01503e-07	2.81458	2.48612	3.18644	0	4.93231	1.0067e-07	1.02337e-07	9.51319e-07	0.265053	138.794	0.267604	1

## Sheet: NonPantodont_premolars_DTA&FEA_
	Time.partition	Trait	RawVariance	BootstrapVariance	F	FciLow	FciHigh	Fp	t	tciLow	tciHigh	tp	aov_p_mean	aov_t	aov_ci_high	aov_p	aov_interpretation (A: E. Paleocene; B: M. Paleocene; C: L. Paleocene)
1	A	DNE	15999.2	4313.69	0	0	0	0	15.638	4228.68	4398.71	1.78872e-49	0.541438	90.2731	0.550401	1
2	B	DNE	31799.3	14271.1	0.038819	0.0342888	0.0439478	0	4.64502	13839.6	14702.6	3.8546e-06	0.659682	85.3069	0.671449	1
3	C	DNE	31415.5	10959.3	4.57949	4.04506	5.18453	0	11.1137	10757.7	11161	3.88916e-27	0.350087	48.7297	0.360226	1
4	A	Slope	66.514	16.0442	0	0	0	0	14.8333	15.9215	16.1669	3.90216e-45	0.345829	91.7966	0.351135	1
5	B	Slope	56.4632	24.8169	0.466398	0.411969	0.528019	1.06077e-32	14.0969	24.6372	24.9965	2.71676e-41	0.308654	77.4686	0.314151	1
6	C	Slope	30.8171	10.6678	5.02371	4.43743	5.68744	0	25.3998	10.5876	10.748	3.34586e-110	0.126867	41.2838	0.129932	1
7	A	OPCR	1471.49	374.121	0	0	0	0	16.1226	369.29	378.952	3.74633e-52	0.338951	69.5185	0.345794	1
8	B	OPCR	2199.61	997.38	0.0362191	0.0319923	0.0410044	0	6.25212	971.996	1022.76	5.99036e-10	0.810488	167.59	0.817959	1
9	C	OPCR	3198.34	1078.84	3.95222	3.49099	4.47438	0	12.1961	1066.07	1091.61	5.40955e-32	0.268805	46.9593	0.276476	1
10	A	RFI	0.0257396	0.00837889	0	0	0	0	33.9234	0.0082326	0.00852519	1.93892e-168	0.520644	64.6158	0.532636	1
11	B	RFI	0.00952115	0.00657502	0.871444	0.769746	0.986579	0.0297643	32.6558	0.00641831	0.00673174	9.62132e-160	0.352146	37.3117	0.365478	1
12	C	RFI	0.0134249	0.00646345	2.62951	2.32264	2.97692	0	46.0562	0.00636681	0.0065601	2.66878e-249	0.293045	30.8019	0.306036	1
13	A	COMP	9.17022e-09	2.46429e-09	0	0	0	0	15.8678	2.41727e-09	2.5113e-09	9.7307e-51	0.0900401	15.7169	0.0942344	1
14	B	COMP	9.55711e-09	5.08647e-09	0.166213	0.146816	0.188173	1.93923e-157	18.7933	4.97116e-09	5.20178e-09	1.05281e-67	0.0269846	-27.0557	0.0283852	1.09459e-121	A-B shift
15	C	COMP	1.12101e-08	3.97752e-09	2.74012	2.42035	3.10215	0	13.3628	3.90786e-09	4.04718e-09	1.36634e-37	0.0673218	9.78539	0.0702362	1
16	A	SHEAR	1.80995e-07	4.23906e-08	0	0	0	0	5.1657	4.19137e-08	4.28675e-08	2.89109e-07	0.311035	116.042	0.314738	1
17	B	SHEAR	6.13265e-07	2.61262e-07	0.0150853	0.0133248	0.0170784	0	2.89829	2.57379e-07	2.65145e-07	0.00383408	0.125008	96.5658	0.126286	1
18	C	SHEAR	5.95613e-07	1.90041e-07	5.12518	4.52707	5.80232	0	4.47522	1.88325e-07	1.91756e-07	8.51063e-06	0.294009	149.278	0.2967	1

## Sheet: NonPantodont_molars_DTA&FEA_sta
	Time.partition	Trait	RawVariance	BootstrapVariance	F	FciLow	FciHigh	Fp	t	tciLow	tciHigh	tp	aov_p_mean	aov_t	aov_ci_high	aov_p	aov_interpretation (A: E. Paleocene; B: M. Paleocene; C: L. Paleocene)
1	A	DNE	31818.6	8657.08	0	0	0	0	31.4576	8568.15	8746.01	1.63582e-151	0.81796	160.692	0.825829	1
2	B	DNE	24344.7	12651.6	0.202953	0.179268	0.229767	1.53103e-127	24.9322	12454.3	12849	4.54474e-107	0.690521	96.3297	0.701468	1
3	C	DNE	37278.8	12629.5	13.121	11.5898	14.8546	0	35.2851	12575	12684	9.3902e-178	0.76835	140.469	0.776769	1
4	A	Slope	70.0799	16.6106	0	0	0	0	13.691	16.5127	16.7085	3.14024e-39	0.422777	97.2994	0.429085	1
5	B	Slope	69.249	29.9338	0.379863	0.335533	0.430051	6.37145e-51	13.3364	29.7748	30.0927	1.84416e-37	0.226762	71.7408	0.230818	1
6	C	Slope	39.9053	13.2115	5.41097	4.77951	6.12587	0	21.288	13.1432	13.2798	3.2224e-83	0.40996	99.9112	0.415892	1
7	A	OPCR	5109.89	1327.96	0	0	0	0	25.1732	1314.97	1340.95	1.1079e-108	0.63722	99.9636	0.646892	1
8	B	OPCR	2874.54	1429.14	0.455144	0.402028	0.515278	1.14106e-34	23.5864	1409.88	1448.39	3.92228e-98	0.405552	56.3599	0.415938	1
9	C	OPCR	3413.75	1235.32	2.0771	1.8347	2.35153	0	24.7549	1221.96	1248.68	6.94556e-106	0.589586	75.7082	0.60132	1
10	A	RFI	0.0147408	0.0048828	0	0	0	0	39.927	0.00480747	0.00495812	3.8234e-209	0.202405	26.7499	0.211785	1
11	B	RFI	0.0169823	0.0101207	0.217628	0.192231	0.246381	1.20786e-117	37.0034	0.00995925	0.0102822	1.8933e-189	0.149391	21.4956	0.157004	1
12	C	RFI	0.0187286	0.00728782	9.0652	8.00728	10.2629	0	52.5131	0.0072342	0.00734145	1.38153e-289	0.661663	90.2717	0.672819	1
13	A	COMP	1.08408e-09	4.10418e-10	0	0	0	0	50.8527	4.04088e-10	4.16748e-10	1.94333e-279	0.0540101	2.5418	0.0566075	0.994411
14	B	COMP	1.26189e-08	5.57751e-09	0.136811	0.120845	0.154887	1.28962e-188	36.6527	5.5604e-09	5.59462e-09	4.55082e-187	0.0557581	4.7697	0.0577456	0.999999
15	C	COMP	3.33593e-09	1.23422e-09	1.41839	1.25286	1.60578	3.62297e-08	26.1849	1.21985e-09	1.24859e-09	1.7291e-115	0.125762	36.5813	0.129171	1
16	A	SHEAR	1.97594e-08	4.67719e-09	0	0	0	0	10.158	4.64117e-09	4.7132e-09	3.88125e-23	0.0905606	50.2939	0.0918884	1
17	B	SHEAR	1.44155e-07	6.03907e-08	1.07757	0.951818	1.21994	0.2379	18.44	6.0356e-08	6.04253e-08	1.41017e-65	0.0848687	68.4182	0.0857077	1
18	C	SHEAR	4.05536e-08	1.30251e-08	0.0908449	0.0802432	0.102847	1.43194e-259	6.00244	1.291e-08	1.31401e-08	2.71654e-09	0.152949	127.381	0.15428	1
