# Supplementary material for: Brawn before bite in endemic Asian eutherian mammals after the end-Cretaceous extinction
Source: eLife. 2026 Jun 30;14:RP108917. doi: 10.7554/eLife.108917 (PMC13318306; doi:10.7554/eLife.108917)
Supplement: Source data 10. [file elife-108917-data10.xlsx]

## Sheet: Sheet1
Nanxiong	Late Paleocene	Ma et al. 2012
Rhoipites	Myrtacidites	Ulmipollenites	Celtispollenites	Rhamnacidites	Plicapollis	Triporopollenites	Tricolporopollenites	Tricolpites	Cupuliferoipollenites	Salixipollenites	Alnipollenites	Engelhardtioidites	Quercodites	Proteacidites	Ephedripites	Pentapollenites	Deltoidospora	Toroisporis	Zlivisporites	Pterisisporites
3.5	2	6.2	2	3.1	4.1	7.6	3	2	0.5	2	20.3	1	2.5	0.1	7.1	7.1	1	2	0.5	20.3
Nanxiong	Early Paleocene Xie et al 2020
4.1.1. Paleocene
The Paleocene palynoflora of southern China is represented by the
Shanghu Fm. of the Nanxiong Basin (Fig. 4a). This palynoflora is characterized
by a relatively high abundance of xerophilous or droughtresistant
taxa such as Ephedripites (12.14%), Pterisisporites (12.72%),
and Verrutetraspora (1.73%). Pollen representing broad-leaved taxa are												1	12.661
also abundant, the principal taxa being Quercoidites (9.25%),												2	5.922
Ulmipollenites (8.67%), Liquidambarpollenites, Juglanspollenites, and												3	1.765
Cupuliferoipollenites, accompanied by a great variety of tropical and subtropical												4	2.395
taxa, such as Rhoipites, Euphorbiacites, Rutaceoipollenites, and												5	1.701
Caryapollenites, though they commonly have scattered occurrences.												6	1.387
The abundance of coniferous pollen taxa is relatively low (16.76%),												7	2.268
dominated by Pinuspollenites, Abietineaepollenites, Taxodiaceaepollenites,												8	10.835
and Podocarpidites. Other ferns are also common,mostly represented by												9	1.134
thermophilic Toroisporis and Lygodiumsporites.												10	9.197
												11	8.504
Early Paleocene	imagej measured	paper categorized	paper reported									12	1.071
Ephedripites	12.157	xerophilous	0.1214									13	1.576
Pterisisiporites	12.66	xerophilous	0.1272									14	2.772
Verrutetraspora	1.387	xerophilous	0.0173									15	12.157
Quercoidites	9.197	broad-leaved	0.0925									16	3.969
Ulmipollenites	8.504	broad-leaved	0.0867									17	4.661
Liquiambarpollenites	1.576	broad-leaved										18	3.341
Juglanspollenites	1.071	broad-leaved										19	1.827
Cupuliferopollenites	1.134	broad-leaved										20	1.203
Rhoipites		tropical/subtropical
Euphobiacites		tropical/subtropical
Rutaceoipollenites		tropical/subtropical
Caryapollenites		tropical/subtropical
Pinuspollenites	3.969	coniferous	0.1676
Abietineapollenites	4.661	coniferous	0.1676
Taxodiaceaepollenites	1.827	coniferous	0.1676
Podocarpidites	3.341	coniferous	0.1676
Toroisporis	10.835	thermophilic fern
Lygodiumsporites	5.922	thermophilic fern
Deltoidospora	1.765
Undulatisporites	2.395
Biretisporites	1.701
Cyathidtes	2.268
Laricoidites	2.772
Tricolpopollenites	1.203
Late Paleocene								Late Paleocene		Early Paleocene
Rhoipites	3.5	tropical/subtropical													Early Paleocene	Late Paleocene
Myrtacidites	2					0.160622	Ulmipollenites	6.2	broad-leaved	8.504	0.156074			broad-leaved	0.345679	0.238342
Ulmipollenites	6.2	broad-leaved												xerophillic	0.455466	0.709845
Celtispollenites	2					0.0129534	Cupuliferoipollenites	0.5	broad-leaved	1.134	0.0208123			thermophillic	0.198855	0.0518135
Rhamnacidites	3.1					0.0647668	Quercodites	2.5	broad-leaved	9.197	0.168793
Plicapollis	4.1					0.183938	Ephedripites	7.1	xerophilus	12.157	0.223117
Triporopollenites	7.6					0.0518135	Toroisporis	2	thermophilic fern	10.835	0.198855
Tricolporopollenites	3					0.525907	Pterisisporites	20.3	xerophilus	12.66	0.232349
Tricolpites	2							38.6		54.487
Cupuliferoipollenites	0.5	broad-leaved
Salixipollenites	2
Alnipollenites	20.3
Engelhardtioidites	1
Quercodites	2.5	broad-leaved
Proteacidites	0.1
Ephedripites	7.1	xerophilus
Pentapollenites	7.1
Deltoidospora	1
Toroisporis	2	thermophilic fern
Zlivisporites	0.5
Pterisisporites	20.3	xerophilus
